1 Global Burden of Disease worldwide cohort analysis of  
2 dietary and other risk factors for cardiovascular diseases:  
3 lipid hypothesis versus fat-soluble vitamin hypothesis

4 David K Cundiff (0000-0002-3206-9665), independent researcher,<sup>1,3</sup> Chunyi Wu (0000-0002-  
5 2186-3433), Research Epidemiologist/Statistician,<sup>2,3</sup>

6 1 Long Beach, California, USA

7 2 Area Specialist Lead in Epidemiology and Statistics, Michigan Medicine, Ann Arbor,  
8 Michigan, USA

9 3 Volunteer collaborators with the Institute of Health Metrics and Evaluation, Seattle,  
10 Washington, USA

11 Correspondence to David K Cundiff [davidkcundiff@gmail.com](mailto:davidkcundiff@gmail.com) Phone: 01-562-438-8805

12 Word count: abstract 389, Text: 4574

13

14

15 **Abstract**

16 **Background** Regarding diet's contribution to cardiovascular disease, Ancel Keys, MD proposed  
17 his "lipid hypothesis" in the 1950s. Despite USDA Dietary Guidelines endorsing the lipid  
18 hypothesis, debate about whether dietary saturated fat and cholesterol cause cardiovascular  
19 disease has continued.

20

21 **Methods** Using Global Burden of Disease (GBD 2017) data on cardiovascular disease  
22 deaths/100k/year, ages 15-69 years old in male and female cohorts (CVD) and dietary and other  
23 risk factors, we formatted and population weighted data from 195 countries. Each of the resulting  
24 7846 rows of data (cohorts) represented about 1 million people, projected to total about 7.8  
25 billion people in 2020. We correlated CVD with dietary and other risk factors worldwide and in  
26 appropriate subsets.

27

28 **Findings** All foods were expressed in kilocalories/day (KC/d). We summed the KC/d of  
29 processed meat, red meat, fish, milk, poultry, eggs, and added (saturated fatty acid,  
30 polyunsaturated fatty acid, and trans fatty acid) to create a "fat-soluble vitamins variable"  
31 (FSVV) high in vitamins A, D, E, and K2 (menaquinones). Low density lipoprotein cholesterol  
32 (LDL-c) correlated positively with LSVV worldwide ( $r=0.780$ , 95% CI 0.771 to 0.788,  
33  $p<0.0001$ ,  $n=7846$  cohorts), so we considered LSVV our marker variable to test the lipid  
34 hypothesis as well as our fat-soluble vitamin hypothesis. The FSVV correlated negatively with  
35 CVD worldwide ( $r= -0.329$ , 95% CI -0.349 to -0.309,  $p<0.0001$ ), and FSVV correlated  
36 positively with CVD in high FSVV cohorts (when  $FSVV \geq 567.3$  KC/d:  $r=0.523$ , 95% CI 0.476 to  
37 0.567,  $p<0.0001$ ,  $n=974$  cohorts). Meat and poultry negatively correlated with CVD worldwide

38 (e.g., red meat mean=50.27 KC/d,  $r = -0.232$ , 95% CI -0.253 to -0.211,  $p < 0.0001$ ) and positively  
39 with CVD in high FSVV cohorts (e.g., red meat mean=122.2 KC/d,  $r = 0.655$ , 95% CI 0.618 to  
40 0.690,  $p < 0.0001$ ,  $n = 974$  cohorts).

41  
42 **Interpretation:** Since FSVV correlated positively with CVD in high FSVV cohorts  
43 ( $FSVV \geq 567.3$  KC/d,  $n = 974$  cohorts), the lipid hypothesis is supported only in GBD cohorts and  
44 individuals with high FSVV intake. These data support the fat-soluble vitamins hypothesis  
45 because FSVV correlated negatively with CVD worldwide, meaning the more fat-soluble  
46 vitamin containing animal foods and fat for gut absorption the less the CVD. In high FSVV  
47 countries, reducing meat and poultry intake by at least half would likely reduce CVD  
48 significantly. This GBD cohort methodology could supplement prospective observational studies  
49 of individuals to be used in developing food policy and education strategies for reducing CVD  
50 and improving public health.

51 **Funding:** None

52

53

54 **Research in context**

55 **Evidence before this study**

56 In the field of nutritional epidemiology, controversies abound. The lipid hypothesis that dietary  
57 saturated fat and cholesterol promote cardiovascular diseases has been disputed recently with no  
58 scientific consensus on the outcome.

59

60 **Added value of this study**

61  
62 With worldwide GBD data, we created a fat-soluble vitamins variable (FSVV) with animal  
63 foods—the primary source of fat-soluble vitamins—and fatty acids—the vehicle for absorption  
64 of vitamins A, D, E, and K. We found a strong positive correlation between LDLc and FSVV  
65 worldwide. Consequently, we used FSVV to test both the lipid hypothesis and our fat-soluble  
66 vitamin hypothesis. CVD correlated negatively with FSVV worldwide, meaning insufficient fat-  
67 soluble vitamin containing animal food and added fatty acid intake associated with increased  
68 CVD. In the subset with high FSVV ( $FSVV \geq 567.3$ ,  $n=974$  cohorts), CVD positively correlated  
69 with FSVV, suggesting that excessive saturated fat and cholesterol containing food and added  
70 fatty acids associates with increased CVD.

71

72 Low poultry and meat intake associated with higher CVD worldwide (i.e., mean processed  
73 meat=5.3 KC/d, red meat=50.3 KC/d, poultry=44.3 KC/d). However, in high FSVV countries,  
74 high meat and poultry intakes associated with higher CVD (i.e., with  $FSVV \geq 567.3$  KC/d, mean  
75 processed meat=25.0 KC/d, mean red meat=122.2 KC/d, mean poultry=130.0 KC/d,  $n=974$   
76 cohorts). Eggs, fish, and milk products in any amount associated with lower CVD.

77

## 78 **Implications of all the available evidence**

79 The data support the fat-soluble vitamin hypothesis worldwide and the lipid hypothesis only in  
80 high FSVV cohorts and individuals. These findings are plausible because deficiencies of  
81 vitamins A, D, E, and K (fat soluble vitamins) and fatty acids, required for gut absorption, have  
82 been documented to lead to cardiovascular adverse effects. These findings are consistent with the  
83 lipid hypothesis in individuals within high FSVV intake countries (e.g., Seven Country Study  
84 and Framingham Heart Study). In high FSVV countries, such as in the USA and Europe, the data  
85 suggest that public health strategies should endeavor to promote reduction of animal foods and  
86 added fats, particularly meat and poultry consumption. In developing countries with low FSVV  
87 intake, supplemental fat-soluble vitamin intake should be studied. This GBD data-based  
88 methodology can enhance understanding of the complex interrelationships of dietary and other  
89 risk factors with CVD and other health endpoints.

90

## 91 **Introduction**

92 The Seven Countries Study, led by Ancel Keys, an epidemiologist from the  
93 University of Minnesota and the lipid hypothesis' major proponent, involved 12,763  
94 males, 40–59 years of age, in seven countries, in four regions of the world (United  
95 States, Northern Europe, Southern Europe, and Japan) beginning in 1958.<sup>1</sup> All these  
96 regions had relatively high animal food intake compared with the rest of the world.  
97 The study concluded that dietary saturated fatty acid leading to  
98 hypercholesterolemia was a major cause of coronary artery disease (CAD). Two  
99 concerns with the lipid hypothesis are that middle-aged males in these countries may  
100 not be representative of CAD or overall cardiovascular disease epidemiology  
101 worldwide and that tobacco smoking (a major risk factor for CAD) also raises serum  
102 cholesterol. Randomized trial data of lipid lowering drug treatment have also been  
103 much less than consistently supportive of its efficacy in lowering CVD.<sup>2</sup>

104

105 The scientific validity of the Dietary Guidelines for Americans for 2015-2020, including  
106 guidelines based on the lipid hypothesis, was challenged by Journalist Nina Teicholz in the  
107 *BMJ*.<sup>3</sup> The Center for Science in the Public Interest called for the *BMJ* to retract the article. The  
108 peer reviewers the *BMJ* selected to adjudicate the far reaching dispute concluded that,  
109 “Teicholz’s criticisms of the methods used by Dietary Guidelines for Americans Committee are  
110 within the realm of scientific debate.”<sup>4</sup>

111

112 We define the fat-soluble vitamin hypothesis as, “suboptimal dietary intake of fat-  
113 soluble vitamins and added fat for gut absorption increases cardiovascular diseases.”

114 Fat-soluble vitamins include vitamins A, D, E, and K (K1=phylloquinones and K2=  
115 menaquinones). Vitamin A and its beta-carotene precursor are important in preventing congenital  
116 heart disease.<sup>5,6</sup> Vitamin E protects the vasculature against oxidative stress, including lipid  
117 peroxidation and the production of atherogenic forms of LDLc—a part of the pathogenesis of  
118 cardiovascular disease.<sup>7</sup> Vitamin K2 (menaquinones from animal foods and fermented plant  
119 products) inhibits arterial calcification, a major factor in the pathogenesis of atherosclerosis and  
120 cardiovascular disease.<sup>8</sup> Regarding vitamin D, a meta-analysis showed an inverse  
121 association between cardiovascular disease and circulating 25(OH)-vitamin D  
122 ranging from 20 to 60 nmol/L.<sup>9</sup> The four fat-soluble vitamins come primarily from  
123 animal foods. Vitamin K2 levels are high in aged cheeses, other fermented dairy  
124 products,<sup>10</sup> organ meats (e.g., bovine and pork liver), chicken, and egg yolks.<sup>11</sup> The  
125 highest vitamin K2 levels per 100g serving are in fermented legumes, particularly  
126 soy (e.g., natto and miso (Japan),<sup>12,13</sup> soybean Douchi, soybean Meitauza, and soybean curd  
127 (China and Taiwan),<sup>14</sup> and Cheonggukjang, a fermented soybean stew (South Korea)).<sup>15</sup>

128  
129 This paper will use population weighted, formatted worldwide Global Burden of Disease data  
130 from 2017 (GBD 2017) from the Institute of Health Metrics and Evaluation (IHME) to assess the  
131 impact of dietary and other risk factors on cardiovascular disease early deaths.

132

## 133 **Methods**

134 As volunteer collaborators with the IHME, we utilised raw GBD worldwide ecological data  
135 (GBD 2017: 195 countries and 365 subnational locations (n=1120 male and female cohorts)).  
136 Data consisted of the rate of cardiovascular disease early deaths, metabolic risk factors, dietary  
137 risk factors and covariates, and other risk factors of male and female cohorts 15-49 years old and  
138 50-69 years old from each year 1990-2017. For cardiovascular disease early deaths and all risk  
139 factors, we averaged the values for ages 15-49 years old together with 50-69 years old for each  
140 male and female cohort for each year. Finally, for each male and female cohort, data from all 28  
141 years (1990-2017) of the means of the rate of cardiovascular disease early deaths and risk factor  
142 exposures were averaged using the computer software program R. We defined the rate of  
143 cardiovascular disease early deaths as “deaths/100k/year of males and females 15-69 years old”:  
144 abbreviated CVD.

145  
146 Food risk factors came from IHME as gram/day (g/d) consumed per capita. GBD dietary  
147 covariate data originally came from Food and Agriculture Organization surveys of animal and  
148 plant food commodities available per capita in countries worldwide (potatoes, corn, rice, sweet  
149 potatoes, poultry, and eggs)—as opposed to consumed per capita.<sup>16</sup> Supplementary Table 1 lists  
150 the relevant GBD risk factors, covariates, and other available variables with definitions of those  
151 risk factor exposures.<sup>17</sup>

152  
153 GBD worldwide citations of over 12,000 surveys constituting ecological data inputs for this  
154 analysis are available online from IHME.<sup>16</sup> The main characteristics of IHME GBD data sources,  
155 the protocol for the GBD study, and all risk factor values have been published by IHME GBD



156 data researchers and discussed elsewhere.<sup>18-21</sup> These include detailed descriptions of categories  
157 of input data, potentially important biases, and the methodologies of analysis. We did not clean  
158 or pre-process any of the GBD data. GBD cohort risk factor and health outcome data from the  
159 IHME had no missing records. Because the GBD data for the study came from IHME, no ethics  
160 committee approval or institutional review board review was needed for this post hoc statistical  
161 analysis. Once IHME staff time constraints due to COVID-19 data collection and modeling are  
162 over, the updated GBD 2019 data with all the variables as the GBD 2017 data we used for this  
163 analysis may be obtained by volunteer researchers collaborating with IHME.<sup>22</sup>

164  
165 To weigh the data according to population, internet searches (mostly Wikipedia) yielded the  
166 most recent population estimates for countries and subnational states, provinces, and regions.  
167 The 1120 GBD cohorts available were population weighted by a software program in R resulting  
168 in an analysis dataset with 7846 population weighted cohorts representing about 7.8 billion  
169 people in 2020. Each male or female cohort in the population-weighted analysis dataset  
170 represented approximately 1 million people (range: < 100,000 to 1.5 million). For example, India  
171 with about 1.234 billion people had 617 rows of the same data for males and 617 rows for  
172 females. Maldives, with about 445,000 people, had a single row of data for males and another for  
173 females. Without population-weighting the data, cohorts in India and Maldives each would have  
174 had one row for males and one row for females in the analysis dataset, invalidating the analysis  
175 results. World population data from the World Bank or the Organisation for Economic Co-  
176 operation and Development could not be used because they did not include all 195 countries or  
177 any subnational data.

178

179 This report followed the STrengthening the Reporting of OBservational studies in Epidemiology  
180 (STROBE) guidelines for reporting global health estimates (Supplementary Table 2).<sup>23</sup>

181  
182 Supplementary Table 3 details how omega-3 fatty acid g/d was converted to fish g/d using data  
183 on the omega-3 fatty acid content of frequently eaten fish from the National Institutes of Health  
184 Office of Dietary Supplements (USA).<sup>24</sup> As shown in Supplementary Table 4, we converted all  
185 of the animal and plant food data, including alcohol and sugary beverage consumption, from g/d  
186 to kilocalories/day (KC/d). For the g/d to KC/d conversions, we used the Nutritionix track app,<sup>25</sup>  
187 which tracks types and quantities of foods consumed. Saturated fatty acids (0-1 portion of the  
188 entire diet) was not available with GBD 2017 data, so GBD saturated fatty acids risk factor data  
189 from GBD 2016 was used. Polyunsaturated fatty acid and trans fatty acid GBD risk factor data  
190 from 2017 (0-1 portion of the entire diet) were also utilised, but monounsaturated fat data were  
191 not available. These fatty acid data expressed as 0-1 portion of the entire diet were converted to  
192 KC/d by multiplying by the total KC/d available per capita for each cohort.

193  
194 The principal outcome variable, CVD, was a combination variable consisting of the  
195 deaths/100k/year from ischemic heart disease, stroke, hypertensive heart disease, rheumatic heart  
196 disease, non-rheumatic valvular disease, subarachnoid haematoma, myocarditis, alcoholic  
197 cardiomyopathy, endocarditis, aortic aneurysm, and atrial fibrillation.

198

## 199 **Statistical methods**

200 To determine the strengths of the risk factor correlations with CVD of population weighted  
201 worldwide cohorts (n=7846 cohorts) or subgroups of cohorts (e.g., highest and lowest CVD

202 cohorts, etc.), we utilised Pearson correlation coefficients:  $r$ , 95% confidence intervals (CIs), and  
203  $p$  values.

204

205 We used SAS and SAS OnDemand for Academics software 9.4 (SAS Institute, Cary, NC) for the  
206 data analysis.

## 207 **Results**

208 Table 1 shows the 43 dietary and other risk factors potentially contributing to CVD. See  
209 Supplementary Table 1 for definitions of the risk factor and co-variate variables. LDLc  
210 negatively correlated with CVD worldwide ( $r=-0.279$ , 95% CI -0.299 to -0.258,  $p<0.0001$ , Table  
211 1), meaning the higher the LDLc mmol/L the lower the CVD. Figure 1 gives the worldwide plot  
212 of LDLc versus CVD, showing widely scattered data points.

213  
214 To test the fat-soluble vitamin hypothesis, we summed the KC/d of processed meat, red meat,  
215 fish, milk (including all dairy products), poultry, eggs, and added fat (saturated fatty acid (SFA),  
216 polyunsaturated fatty acid (PUFA), and trans fatty acid (TFA)) to create a fat-soluble vitamins  
217 variable (FSVV). In determining the portion of SFA, PUFA, and TFA added in addition to the  
218 SFA, PUFA, and TFA in the animal and plant foods, an adjustment factor (fatty acids \* 0.46),  
219 adapted from the website “Our World in Data,” differentiated the fatty acids in individual foods  
220 from the added fatty acids (46% of the total).<sup>26</sup> This adjustment prevented double counting fatty  
221 acids KC/d and allowed a reasonably accurate determination of FSVV KC/d. The FSVV  
222 negatively correlated with CVD worldwide ( $r=-0.329$ , 95% CI -0.349 to -0.309,  $p<0.0001$ , Table  
223 1), meaning more FSVV KC/d (processed meats KC/d + red meats KC/d + fish and seafood  
224 KC/d + milk KC/d + poultry KC/d + eggs KC/d + added fatty acids) associated with reduced  
225 CVD.

226  
227 Table 1 shows that six of the nine plant foods negatively correlated with CVD. Potatoes (KC/d  
228 available, a covariate derived from total potato KC available/population, including highly  
229 processed potatoes) positively correlated with CVD ( $r=0.050$ , 95% CI 0.028 to 0.073,  $p<0.0001$ ).

230 Sugary beverages also correlated positively with CVD ( $r=0.113$ , 95% CI 0.091 to 0.135,  
231  $p<0.0001$ ). Rice and legumes were not significantly correlated with CVD.

232

233 Child underweight, ambient air pollution, smoking tobacco, sublingual tobacco use, kidney  
234 disease, types 1 and 2 diabetes deaths, and systolic blood pressure all positively correlated with  
235 CVD. Sex (male 1 and female 2) negatively correlated with CVD, meaning females had less  
236 CVD risk than males.

237

238 Table 2 is a subset of worldwide cohorts that included 500 male and female pairs of cohorts  
239 (total=1000 cohorts, an arbitrary number, representing approximately 1 billion people out of  
240 about 7.8 billion people worldwide) with the lowest CVD values ( $CVD \leq 293.0$  compared with  
241 mean  $CVD=543.7$  worldwide).

242

243 Table 3 shows FSVV related risk factors (processed meat, red meat, fish, milk, poultry, eggs, and  
244 added (SFA+PUFA+TFA)) for the 34 countries in descending order by CVD. Japan, with the  
245 lowest CVD worldwide ( $CVD=169.2$ ), had the highest KC/d for fish and eggs (fish=260.5 KC/d  
246 and eggs=53.2 KC/d) and otherwise relatively low values for meat, milk and poultry. The  
247 countries with  $FSVV < 300$  KC/d tended to be clustered at the high CVD end of the Table 3 (i.e.,  
248 Guatemala:  $FSVV=231.1$  and  $CVD=269.9$ , Kenya:  $FSVV=150.04$  and  $CVD=270.0$ , Nicaragua:  
249  $FSVV=214.2$  and  $CVD=282.0$ , Tehran (Iran):  $FSVV=299.7$  and  $CVD=283.3$ , and Thailand:  
250  $FSVV=247.4$  and  $CVD=289.9$ ).

251

252 Table 4 gives all the CVD risk factors for seven representative countries out of the 34 countries  
253 in Tables 2 and 3 ( $CVD \leq 293.0$ ). Japan not only had high FSVV but also had relatively high  
254 intake of GBD risk factor plant foods (fruits, vegetables, nuts and seeds, whole grains, and  
255 legumes: 350.9 KC/d). France was characteristic of 23 other low CVD countries in that intake of  
256 milk products was high (France milk=95.8 KC/d and the other 23 countries' milk>68 KC/d,  
257 Table 3). The low CVD of Peru might be attributed to a relatively low smoking rate (7.5%) and  
258 good metabolic statistics (mean BMI=23.3 Kg/M<sup>2</sup>, mean FPG=4.01 mmol/L, mean LDLc=2.37  
259 mmol/L, mean SBP=125.2 mm/Hg). While Mexico had a lower FSVV than most low CVD  
260 countries (Mexico FSVV=413.3 KC/d), like Japan it had relatively high intake of important plant  
261 foods (fruits, vegetables, nuts and seeds, whole grains, and legumes: totaling 351.7 KC/d).  
262 Panama, with FSVV=383.8 KC/d, had relatively high physical activity (Panama physical  
263 activity=4935 METs) and low smoking rate (male/female mean smoking=7.3%). While  
264 Guatemala had relatively low FSVV (FSVV=231.1 KC/d) and low GBD risk factor plant food  
265 intake (fruits, vegetables, nuts and seeds, whole grains, and legumes: 249.5 KC/d), it had  
266 relatively high physical activity (physical activity=6142 METs) and a low smoking rate  
267 (male/female mean smoking=7.7%). Ecuador had an intermediary FSVV (FSVV=375.4 KC/d)  
268 and relatively low intake of important plant foods (fruits, vegetables, nuts and seeds, whole  
269 grains, and legumes: totaling 205.3 KC/d). However, Ecuador had a low rate of smoking  
270 (male/female mean smoking=8.0%). and a low SBP (mean SBP=126.9 mm/Hg).

271  
272 Table 5 shows the statistics for countries with  $FSVV \geq 567.3$  KC/d (i.e., at or above the median  
273 FSVV of Table 2 countries). In this subset of 974 cohorts, of which 500 were included in the low

274 CVD subset (Table 2), FSVV positively correlated with CVD ( $r=0.523$ , 95% CI 0.476 to 0.567,  
275  $p<0.0001$ ).

276

277 Although FSVV correlated strongly with LDLc worldwide ( $r=0.780$ , 95% CI 0.771 to 0.788,  
278  $p<0.0001$ ,  $n=7846$  cohorts, Table 1), FSVV negatively correlated with LDLc in cohorts with  
279  $FSVV \geq 567.3$  KC/d ( $r=-0.254$ , 95% CI -0.312 to -0.194,  $p<0.0001$ ,  $n=974$  cohorts). Also with  
280  $FSVV \geq 567.3$  KC/d, LDLc and CVD negatively correlated ( $r=-0.254$ , 95% CI -0.312 to -0.194,  
281  $p<0.0001$ ,  $n=974$  cohorts).

282

283 The average alcohol intake was 81.0 KC/d worldwide, and alcohol KC/d correlated negatively  
284 with CVD ( $r=-0.061$ , 95% CI -0.083 to -0.039,  $p<0.0001$ , Table 1). However, with the higher  
285 mean alcohol KC/d intake of 155.0 KC/d in cohorts with  $FSVV \geq 567.3$  KC/d, alcohol was  
286 positively correlated with CVD ( $r=0.475$ , 95% CI 0.425 to 0.522,  $p<0.0001$ ,  $n=974$  cohorts,  
287 Table 5).

288

289 The only fat-soluble vitamin in the GBD database, vitamin A deficiency incidence/100k in  
290 children  $\leq 5$  years old, correlated positively with CVD worldwide ( $r=0.210$ , 95% CI 0.189 to  
291 0.231,  $p<0.0001$ , Table 1). In the cohorts with  $FSVV \geq 567.3$  KC/d who had high intakes of  
292 vitamin A presumably from animal foods, vitamin A deficiency rate in children  $\leq 5$  years old  
293 was much lower compared with worldwide (Vitamin A deficiency=9316/100k/year, Table 5  
294 versus 23,205/100k/year, Table 1).

295

296 Dietary fiber was not significantly correlated with CVD worldwide ( $r=0.019$ , 95% CI  $-0.003$  to  
297  $0.041$ ,  $p=0.09$ , Table 1). Once it was adjusted for FSVV, alcohol, sugary beverages, and  
298 potatoes; dietary fiber correlated negatively with CVD ( $r=-0.052$ , 95% CI  $-0.074$  to  $-0.030$ ,  
299  $p<0.0001$ ).

300

301 Physical activity positively correlated with CVD worldwide ( $r=0.160$ , 95% CI  $0.139$  to  $0.182$ ,  
302  $p<0.0001$ , Table 1). Once it was adjusted for FSVV, smoking, and sex; physical activity  
303 correlated negatively with CVD ( $r=-0.127$ , 95% CI  $-0.149$  to  $-0.104$ ,  $p<0.0001$ ).

304

305 Discontinuing breast feeding before 6 months negatively correlated with CVD worldwide ( $r=-$   
306  $0.302$ , 95% CI  $-0.322$  to  $-0.282$ ,  $p<0.0001$ , Table 1). Once we adjusted it for FSVV, child severe  
307 underweight, and socio-demographic index, discontinuing breast feeding correlated positively  
308 with CVD ( $r=0.044$ , 95% CI  $0.022$  to  $0.066$ ,  $p<0.0001$ ). In cohorts, mostly in developed  
309 countries, with FSVV  $\geq 567.3$  KC/d discontinuing breast feeding correlated positively with CVD  
310 ( $r=0.268$ , 95% CI  $0.208$  to  $0.325$ ,  $p<0.0001$ , Table 5).

311

312 Secondhand smoking negatively correlated with CVD worldwide ( $r=-0.225$ , 95% CI  $-0.246$  to -  
313  $0.204$ ,  $p<0.0001$ , Table 1). Once it was adjusted for smoking, sublingual tobacco use, household  
314 smoke, ambient air pollution, and sex; secondhand smoke correlated positively with CVD  
315 ( $r=0.048$ , 95% CI  $0.025$  to  $0.070$ ,  $p<0.0001$ ).

316



317 The metabolic risk factors, BMI, FPG, and LDLc, all correlated negatively with CVD worldwide  
318 ( $r=-0.240$ , 95% CI  $-0.261$  to  $-0.219$ ,  $p<0.0001$ ,  $r=-0.178$ , 95% CI  $-0.200$  to  $-0.157$ ,  $p<0.0001$ , and  
319  $r=-0.279$ , 95% CI  $-0.299$  to  $-0.258$ ,  $p<0.0001$ , respectively, Table 1). Once they were  
320 adjusted for FSVV, alcohol, sugary beverages, and potatoes; they all correlated positively with  
321 CVD ( $r=0.028$ , 95% CI  $0.006$  to  $0.050$ ,  $p=0.0144$ ,  $r=0.076$ , 95% CI  $0.054$  to  $0.098$ ,  $p<0.0001$ ,  
322  $r=0.170$ , 95% CI  $0.148$  to  $0.191$ ,  $p<0.0001$ , respectively). In the cohorts with  $FSVV \geq 567.3$   
323 KC/d, BMI and FPG positively correlated with CVD ( $r=0.484$ , 95% CI  $0.434$  to  $0.530$ ,  $p<0.0001$   
324 and  $r=0.091$ , 95% CI  $0.028$  to  $0.153$ ,  $p=0.0046$ , respectively).  
325

## 326 **Discussion**

327 Why, in high FSVV cohorts, LDL-c correlated negatively with FSVV ( $r=-0.254$  95% CI -0.312  
328 to -0.194,  $p<0.0001$ ,  $n=974$  cohorts) but positively correlated with LSVV worldwide ( $r=0.780$ ,  
329 95% CI 0.771 to 0.788,  $p<0.0001$ ) is not entirely clear. However, multiple studies have  
330 documented that LDLc may be influenced by genetic, racial, or ethnic differences that do not  
331 necessarily correspond with risk of CVD.<sup>27,28</sup> Additionally, LDLc lowering medications in wide  
332 use especially in high FSVV developed countries may also confound the relationship of LDLc  
333 with CVD risk in this subset cohort analysis. Because of this anomaly with LDLc correlated with  
334 FSVV in high FSVV cohorts and the strong worldwide correlation of LDLc and FSVV, we  
335 considered FSVV positively correlating with CVD as supporting the lipid hypothesis and FSVV  
336 negatively correlating with CVD as supporting the fat-soluble vitamin hypothesis.

337  
338 With this perspective, in high FSVV cohorts ( $FSVV \geq 567.3$  KC/d,  $n=974$  cohorts) where FSVV  
339 positively correlated with CVD ( $r=0.523$  95% CI 0.476 to 0.567,  $p<0.0001$ ,  $n=974$  cohorts), this  
340 analysis strongly supports the lipid hypothesis. Since there are high FSVV and low FSVV people  
341 widely distributed worldwide, prospective observational studies of individuals in high FSVV  
342 areas, rather than GBD cohort studies, could better demonstrate positive correlations between  
343 LDLc (or total cholesterol) and CVD. This may explain why the Seven Countries Study<sup>1</sup> of  
344 Ancel Keys and the Framingham Heart Study,<sup>29</sup> both in high FSVV regions, validated the lipid  
345 hypothesis. However, the Prospective Urban Rural Epidemiology (PURE) Study, with individual  
346 data on 135,335 patients from three high-income, 11 middle-income, and four low-  
347 income countries appears to be at variance with the lipid hypothesis.<sup>30</sup> The PURE Study found  
348 that higher saturated fat intake was associated with lower risk of stroke (quintile 5 vs quintile 1,

349 HR 0.79, (95% CI 0.64 to 0.98),  $p_{\text{trend}}=0.0498$ ). Total fat, saturated fat, and unsaturated fats were  
350 not significantly correlated with risk of myocardial infarction or cardiovascular disease mortality.  
351 Exclusively high FSVV populations appear necessary for lipid hypothesis validation.

352

353 This global data analysis supports the fat-soluble vitamin hypothesis or possibly another  
354 mechanism that accounts for FSVV KC/d being negatively correlated with CVD worldwide ( $r=-$   
355  $0.308$ , 95% CI  $-0.358$  to  $-0.257$ ,  $p<0.0001$ , Table 1). If the fat-soluble vitamins hypothesis is  
356 valid and augmentation of fat-soluble vitamins is not widely provided, the worldwide FSVV  
357 KC/d mean consumption must increase about 85% to minimise CVD (mean FSVV= 288.1 KC/d  
358 worldwide (Table 1) \*  $1.85\approx 531.4$  KC/d (mean FSVV=531.4 KC/d, Table 2)). In the subset of  
359 974 cohorts ( $\approx 1$  billion people) with  $\text{FSVV}\geq 692.6$  KC/d (Table 5), to minimise CVD, FSVV  
360 KC/d mean consumption should be reduced on average by about 23% ( $692.6$  mean KC/d (Table  
361 5) \*  $0.77\approx 531.4$  mean KC/d (presumed optimal FSVV). To minimise CVD in the USA, FSVV  
362 KC/d mean consumption should be reduced on average by about 36% ( $828.8$  mean KC/d \*  
363  $0.64\approx 531.4$  mean KC/d (presumed optimal FSVV, Table 2).

364

365 Given the negative correlations of CVD with both fish and eggs in both tables 1 and 5, the  
366 reduction in FSVV might best come from meat, poultry, and added fats. Although milk  
367 correlated positively with CVD in Table 5 ( $r=0.185$ , 95% CI  $0.123$  to  $0.245$ ,  $p<0.0001$ ), this  
368 probably relates to Japan and Peru having the lowest and fifth lowest CVD in Table 3 (Japan:  
369 mean CVD=169.2, mean milk=29.0 KC/d, Peru: mean CVD=197.7, mean milk=15.3 KC/d). Of  
370 the 34 countries in Table 3, 20 had high milk intakes (mean milk  $\geq 68.8$  KC/d versus mean milk  
371 worldwide=25.0 KC/d) and these all had relatively high per capita intakes of cheese.<sup>31,32</sup>

372 Fermented, full-fat dairy products have high levels of vitamin K2,<sup>10,11</sup> which have been found to  
373 be important in preventing calcification of arteries and atherosclerosis.<sup>33</sup>

374

375 Regarding the Japanese low CVD and low milk KC/d (29.0 KC/d), fish and eggs might be  
376 possible sources of vitamin K2. However, relative to fermented cheeses and egg yolks, fish  
377 content of vitamin K2 is low to negligible.<sup>11</sup> Instead, Japanese consume high quantities of  
378 vitamin K2 in the form of fermented soy products like natto and miso.<sup>12,13</sup> As noted in the  
379 introduction, people in Taiwan and South Korea (also listed among low CVD countries) also  
380 have high intakes of fermented legumes.

381

382 Potatoes KC/d available positively correlated with CVD both worldwide ( $r=0.050$ , 95% CI 0.028  
383 to 0.073,  $p<0.0001$ , Table 1) and in cohorts with  $FSVV\geq 567.3$  KC/d ( $r=0.109$ , 95% CI 0.046 to  
384 0.170,  $p<0.0001$ , Table 5). Notably, half, or more of the potatoes consumed worldwide are in  
385 the form of highly processed food products.<sup>34</sup> Recent large prospective observational studies  
386 have found higher consumption of ultra-processed foods associated with an increased risk of  
387 cardiovascular disease incidence and CVD mortality.<sup>35,36</sup> Data from 79 high- and middle-income  
388 countries show that ultra-processed products dominate the food supplies of high-income  
389 countries and that their consumption is now rapidly increasing in middle-income countries.<sup>37</sup>

390

391 The finding that sodium negatively correlated with CVD worldwide ( $r=-0.213$ , 95% CI -0.234 to  
392 -0.192,  $p<0.0001$ ) is contrary to an analysis of sodium intake versus cardiovascular deaths in 66  
393 countries by Mozaffarian, et. al who attributed 9.5% of cardiovascular deaths worldwide to high  
394 sodium intake.<sup>38</sup> However, O'Donnell and colleagues found the relationship of sodium to

395 cardiovascular disease to be J shaped curve and suggested that the lowest cardiovascular risk is  
396 with moderate sodium intake in the 3-5 g/d range.<sup>39</sup> In this IHME GBD database, the Japanese  
397 had one of the highest levels of dietary sodium (mean sodium excretion =6.01 g/d versus mean  
398 mean sodium excretion worldwide=4.45 g/d) along with high rates of smoking (Japan mean  
399 male/female smoking=26.8%, Table 4 versus mean male/female smoking worldwide=20.5%)  
400 and SBP (Japan mean male/female SBP=137.6 mm/Hg, Table 4 versus mean male/female SBP  
401 worldwide=133.9 mm/Hg, Table 1) but the lowest rate of CVD (mean CVD=169).

402

403 Calcium is essential to cardiovascular function. Calcium's negative correlation with CVD ( $r=-$   
404  $0.177$ , 95% CI  $-0.031$  to  $-0.155$ ,  $p<0.0033$ , Table 1) might have been expected.

405

406 The positive correlation of physical activity with CVD was surprising (Table 1). However, (1)  
407 countries with more CVD reducing FSVV also had less physical activity (FSVV versus physical  
408 activity:  $r=-0.366$ , 95% CI:  $-0.385$  to  $-0.347$ ,  $p<0.0001$ ), (2) females had less physical activity  
409 than males (mean physical activity males=5061 METs/week, mean physical activity  
410 females=4356 METs/week), along with less CVD (mean CVD males=656.2, mean CVD  
411 females=428.6), and (3) males smoked tobacco more than females (mean smoking (0-1)  
412 males=0.339 or 33.9%, mean smoking (0-1) females=0.070 or 7%). When FSVV, sex, and  
413 smoking were held constant, physical activity correlated negatively with CVD worldwide ( $r=-$   
414  $0.126$ , 95% CI  $-0.148$  to  $-0.104$ ,  $p<0.0001$ ).

415

416 The moderately strong positive correlation of child  $\leq 5$  years old severe underweight ( $>2$  SD  
417 below the mean for height) with CVD worldwide ( $r=0.306$ , 95% CI  $0.285$  to  $0.325$ ,  $p<0.0001$ ,

418 Table 1) suggests a relationship of infant/child malnutrition with later CVD. Babies surviving the  
419 so called “Dutch famine” toward the end of the second world war (1944-45) have been shown to  
420 have higher subsequent heart disease than earlier or later cohorts in Holland.<sup>40</sup> The worldwide  
421 average rate of severely underweight babies and children from 1990 – 2017 was 18.5% (Table  
422 1), suggesting that in utero and early infancy severe malnutrition may subsequently contribute  
423 substantially to CVD, especially in developing countries.

424  
425 Prematurely stopping breast feeding positively correlated with CVD in the countries with animal  
426 food plus added fatty acids  $\geq 567.3$  KC/d ( $r=0.268$  95% CI: 0.208 to 0.325,  $p=0.0027$ , Table 5).  
427 In those countries, prematurely stopping breast feeding was quite common relative to developing  
428 countries (range (0-1): 0.129 to 0.268, mean=0.196). A review of observational studies, in  
429 developed countries, of breast feeding related to metabolic risk factors for CVD suggested that  
430 breast feeding was associated with increased insulin sensitivity and decreased systolic blood  
431 pressure in later life. Breast feeding also has metabolic benefits for the mother.<sup>41</sup>

432  
433 According to The World Health Organisation, ambient air pollution (particulate  
434 matter  $\leq 2.5$  micrometers diameter (PM<sub>2.5</sub>)) causes cardiovascular and respiratory diseases and  
435 cancers.<sup>42</sup> The WHO considers  $\geq 10$   $\mu\text{g}/\text{m}^3$  of PM<sub>2.5</sub> particles a health hazard. In this analysis,  
436 the ambient air pollution (PM<sub>2.5</sub>) in the countries with FSVV  $\geq 567.3$  KC/d averaged 12.7  
437  $\mu\text{g}/\text{m}^3$  and mean CVD=273.7 from 1990 to 2017 (Table 5). Worldwide, comparable numbers  
438 were mean CVD=543.7 and air pollution (PM<sub>2.5</sub>) mean=44.7  $\mu\text{g}/\text{m}^3$ .

439  
440  
441 These IHME GBD data support the link of smoking tobacco to CVD ( $r=0.298$ , 95% CI  
442 0.278 to 0.318,  $p<0.0001$ , Table 1). However, given the multiple dietary and other

443 contributors, the CVD population attributable risk for smoking is probably far below  
444 the World Health Organization estimate that tobacco accounts for 20% of coronary  
445 artery disease mortality.<sup>43</sup> The mean incidence of smoking worldwide=20.5% (Table  
446 1). The mean incidence in the 34 countries with the lowest CVD=23.3% (n=974  
447 cohorts). Smoking is clearly a major risk factor for CVD, but these data suggest that  
448 diet is more influential in population attributable risk for CVD.

449

450 The positive correlation of blood lead levels with CVD worldwide (r=0.180, 95% CI 0.159 to  
451 0.201, p<0.0001, Table 1) is consistent with reports that lead toxicity leads to hypertension.<sup>44</sup>  
452 Also, environmental lead exposure has been linked with all-cause mortality,  
453 cardiovascular disease mortality, and ischaemic heart disease mortality in the US.<sup>45</sup>

454

455 This analysis showed that kidney disease correlated positively with CVD (r=0.194, 95% CI  
456 0.173 to 0.215, p<0.0001, Table 1). A systematic GBD review of kidney disease revealed that  
457 chronic kidney disease resulted in 1.2 million deaths in 2017, of which a large portion were from  
458 CVD.<sup>46</sup> Other CVD risk factors may also lead to kidney disease (e.g., systolic hypertension,  
459 types 1 and 2 diabetes).

460

461 Influential Stanford University meta researcher, Dr. John Ioannidis, called for radical reform of  
462 all nutritional epidemiology methodologies used to influence food/agricultural policies and to  
463 produce dietary guidelines for clinicians and the public.<sup>47</sup> Currently, no methodology for relating  
464 cardiovascular disease events to food intake and other risk factors has been generally accepted as  
465 rigorous, replicable, and scientifically valid. This study analysing worldwide data for dietary and

466 other risk factors for cardiovascular disease attempts to answer Dr. Ioannidis' call for a more  
467 rigorous and reliable nutritional epidemiology methodology to base public health policies and  
468 individual dietary guidance.

469

## 470 **Limitations**

471 Our study was subject to all the limitations discussed in previous GBD publications.<sup>48,49</sup> These  
472 included gaps, biases, and inconsistencies in data sources as well as limitations in the methods of  
473 data processing and estimation. Having comprehensive data on dietary inputs is key to more  
474 accurate and reliable analyses. The GBD data on animal foods, plant foods, alcohol, sugary  
475 beverages, and fatty acids were not comprehensive and comprised only 1191.4 KC/d per person  
476 on average worldwide. Subnational data on all risk factors were available on only four countries.  
477 Because the data formatting and statistical methodology were new, this was necessarily a post  
478 hoc analysis and no pre-analysis protocol was possible. This GBD data analysis should be  
479 repeated with the most recently released GBD 2019 data when it becomes available to volunteer  
480 collaborators.

481

## 482 **Generalisability**

483 This new methodology presented for probing the GBD raw data to find correlations between  
484 dietary and other risk factors and health outcomes (e.g., CVD) can be applied to any of the risk  
485 factors and health outcomes available with the new IHME GBD 2019 data.

486



487 **Conclusion**

488 The lipid hypothesis (e.g., SFA from animal foods causing CVD) may well explain the strong  
489 positive correlation of FSVV with CVD in high FSVV cohorts but not worldwide. Global data  
490 analysis supports the fat-soluble vitamin hypothesis, because FSVV is negatively correlated with  
491 CVD worldwide. Defining the optimal FSVV that will reduce CVD risk while not increasing  
492 other diseases (e.g., cancers and obesity) will require more research. Supplements of fat-soluble  
493 vitamins to reduce the FSVV required to minimise CVD should be studied, especially in  
494 developing countries with less access to animal foods. Reducing FSVV KC/d would also  
495 decrease the environmental impacts of animal foods. The findings for the non-dietary risk factors  
496 are all consistent with the medical literature except for sodium's negative correlation with CVD.

497  
498 This methodology of analysing IHME GBD data should augment systematic literature reviews in  
499 developing food and other risk factor policy and education strategies for forming policy  
500 recommendations, clinical practice guidelines, and public health recommendations. GBD data  
501 analysis can bring more rigor, precision, and consensus to the field of population health,  
502 especially in the areas of dietary risk factors.

503

504

505 **Table 1. Dietary and other risks related to CVD worldwide (n=7846 cohorts)**  
506

| CVD and CVD risk factors                   | Mean   | SD     | Min    | Max     | r      | 95%<br>CI low | 95%<br>CI high | p      |
|--------------------------------------------|--------|--------|--------|---------|--------|---------------|----------------|--------|
| <b>CVD/100k/year ages 15-69</b>            | 543.66 | 288.01 | 73.47  | 1844    |        |               |                |        |
| <b>CVD/100k/year ages 15-69 mean m/f</b>   | 543.69 | 246.13 | 135.46 | 1727    | 0.855  | 0.849         | 0.860          | <.0001 |
| <b>LDL cholesterol mmol/L</b>              | 2.35   | 0.40   | 1.27   | 3.25    | -0.279 | -0.299        | -0.258         | <.0001 |
| <b>Fat-soluble vitamin variable (FSVV)</b> | 285.36 | 193.31 | 58.78  | 932.18  | -0.329 | -0.349        | -0.309         | <.0001 |
| <b>Processed meat KC/d</b>                 | 5.33   | 9.72   | 0.20   | 68.77   | -0.204 | -0.226        | -0.183         | <.0001 |
| <b>Red meat KC/d</b>                       | 50.27  | 45.13  | 3.21   | 235.95  | -0.232 | -0.253        | -0.211         | <.0001 |
| <b>Fish KC/d</b>                           | 9.99   | 36.52  | 0.40   | 370.36  | -0.203 | -0.224        | -0.181         | <.0001 |
| <b>Milk KC/d</b>                           | 25.04  | 27.05  | 1.06   | 146.82  | -0.192 | -0.214        | -0.171         | <.0001 |
| <b>Poultry KC/d available</b>              | 44.32  | 50.08  | 1.06   | 411.87  | -0.289 | -0.309        | -0.268         | <.0001 |
| <b>Eggs KC/d available</b>                 | 19.36  | 14.71  | 0.79   | 69.64   | -0.390 | -0.408        | -0.371         | <.0001 |
| <b>Added Saturated fatty acids KC/d</b>    | 87.67  | 29.41  | 32.56  | 221.29  | -0.239 | -0.260        | -0.219         | <.0001 |
| <b>Added PUFAs KC/d</b>                    | 37.30  | 33.78  | 1.35   | 175.40  | -0.316 | -0.336        | -0.296         | <.0001 |
| <b>Added Trans fatty acids KC/d</b>        | 6.09   | 6.28   | 0.91   | 35.77   | -0.104 | -0.126        | -0.082         | <.0001 |
| <b>Alcohol KC/d</b>                        | 81.03  | 57.33  | 4.25   | 429.81  | -0.061 | -0.083        | -0.039         | <.0001 |
| <b>Sugary beverages KC/d</b>               | 298.36 | 152.38 | 72.91  | 1472.00 | 0.113  | 0.091         | 0.135          | <.0001 |
| <b>Potatoes KC/d available</b>             | 84.04  | 74.60  | 3.07   | 533.88  | 0.050  | 0.028         | 0.073          | <.0001 |
| <b>Corn KC/d available</b>                 | 34.72  | 48.28  | 0.16   | 305.17  | -0.062 | -0.084        | -0.040         | <.0001 |
| <b>Fruits KC/d</b>                         | 40.21  | 22.50  | 3.58   | 161.39  | -0.355 | -0.374        | -0.336         | <.0001 |
| <b>Vegetables KC/d</b>                     | 79.76  | 43.12  | 9.48   | 304.17  | -0.107 | -0.128        | -0.085         | <.0001 |
| <b>Nuts and seeds KC/d</b>                 | 8.41   | 8.36   | 0.05   | 102.99  | -0.277 | -0.297        | -0.256         | <.0001 |
| <b>Whole grains KC/d</b>                   | 55.65  | 30.93  | 1.14   | 235.10  | -0.194 | -0.216        | -0.173         | <.0001 |
| <b>Legumes KC/d</b>                        | 51.74  | 32.23  | 0.51   | 194.70  | -0.024 | -0.046        | -0.002         | 0.0319 |
| <b>Rice KC/d available</b>                 | 141.86 | 116.34 | 1.42   | 461.80  | 0.007  | -0.015        | 0.029          | 0.5417 |
| <b>Sweet potatoes KC/d available</b>       | 22.76  | 35.95  | 0.02   | 364.74  | -0.167 | -0.189        | -0.146         | <.0001 |
| <b>Total KC/d available</b>                | 2574   | 418    | 1579   | 3898    | -0.203 | -0.224        | -0.181         | <.0001 |
| <b>Vit A deficiency children/100k/yr</b>   | 23205  | 10939  | 1267   | 50969   | 0.210  | 0.189         | 0.231          | <.0001 |
| <b>Sodium g/d</b>                          | 4.45   | 2.34   | 1.33   | 9.21    | -0.214 | -0.235        | -0.193         | <.0001 |
| <b>Calcium g/d</b>                         | 0.301  | 0.179  | 0.081  | 1.044   | -0.169 | -0.191        | -0.148         | <.0001 |
| <b>Dietary fiber g/d</b>                   | 9.21   | 3.15   | 2.72   | 22.68   | 0.019  | -0.003        | 0.041          | 0.0932 |
| <b>Physical activity METs</b>              | 4714   | 1368   | 1609   | 7669    | 0.160  | 0.139         | 0.182          | <.0001 |
| <b>Child underweight &gt;2SD</b>           | 0.186  | 0.171  | 0.004  | 0.535   | 0.302  | 0.282         | 0.322          | <.0001 |
| <b>Stop breast feeding &lt;6 months</b>    | 0.119  | 0.055  | 0.016  | 0.242   | -0.302 | -0.322        | -0.282         | <.0001 |
| <b>Ambient pollution PM<sub>0.25</sub></b> | 44.73  | 26.46  | 4.38   | 95.54   | 0.153  | 0.131         | 0.174          | <.0001 |
| <b>Smoking rate (0-1)</b>                  | 0.205  | 0.176  | 0.003  | 0.640   | 0.297  | 0.277         | 0.317          | <.0001 |
| <b>Secondhand smoking (0-1)</b>            | 0.376  | 0.155  | 0.164  | 0.796   | -0.225 | -0.246        | -0.204         | <.0001 |
| <b>Sublingual tobacco rate (0-1)</b>       | 0.068  | 0.095  | 0.001  | 0.419   | 0.284  | 0.264         | 0.304          | <.0001 |
| <b>Blood lead level mcg/dl</b>             | 5.01   | 1.01   | 1.22   | 8.37    | 0.180  | 0.159         | 0.201          | <.0001 |
| <b>Household air pollution (0-1)</b>       | 0.482  | 0.325  | 0.000  | 0.996   | 0.179  | 0.158         | 0.201          | <.0001 |
| <b>Kidney disease stage III (0-1)</b>      | 0.056  | 0.028  | 0.015  | 0.154   | 0.194  | 0.173         | 0.215          | <.0001 |
| <b>Type 1 DM early deaths</b>              | 10.37  | 9.39   | 0.55   | 112.49  | 0.340  | 0.320         | 0.359          | <.0001 |
| <b>Type 2 DM early deaths</b>              | 17.50  | 15.65  | 0.63   | 269.67  | 0.227  | 0.205         | 0.247          | <.0001 |
| <b>BMI kg/M<sup>2</sup></b>                | 21.77  | 2.29   | 17.95  | 29.39   | -0.240 | -0.261        | -0.219         | <.0001 |
| <b>Fasting plasma glucose mmol/L</b>       | 4.30   | 0.35   | 3.32   | 5.58    | -0.178 | -0.200        | -0.157         | <.0001 |
| <b>Systolic BP mm Hg</b>                   | 133.91 | 4.32   | 123.41 | 147.89  | 0.195  | 0.174         | 0.216          | <.0001 |
| <b>Socio-demographic index (0-1)</b>       | 0.543  | 0.174  | 0.112  | 0.896   | -0.337 | -0.357        | -0.317         | <.0001 |
| <b>Sex male 1 and female 2</b>             | 1.50   | 0.50   | 1.00   | 2.00    | -0.395 | -0.414        | -0.376         | <.0001 |

507 **Table 2. CVD lowest and highest 1000 cohorts (≈1 billion people)**

| CVD and risk factors                           | CVD lowest ≈1 billion people (n=1000 cohorts) |        |        |         | CVD highest ≈1 billion people (n=1000 cohorts) |        |        |        |
|------------------------------------------------|-----------------------------------------------|--------|--------|---------|------------------------------------------------|--------|--------|--------|
|                                                | Mean                                          | SD     | Min    | Max     | Mean                                           | SD     | Min    | Max    |
| <b>Cardiovascular Disease deaths/100k/year</b> | 227.81                                        | 95.25  | 73.47  | 422.36  | 1045                                           | 356.90 | 430.20 | 1844   |
| <b>CVD male/female mean</b>                    | 227.81                                        | 42.52  | 135.46 | 292.97  | 1045                                           | 200.47 | 802.24 | 1727   |
| <b>LDL cholesterol mmol/L</b>                  | 2.808                                         | 0.256  | 1.598  | 3.247   | 2.376                                          | 0.380  | 1.35   | 3.20   |
| <b>Fat-soluble vitamin variable (FSVV)</b>     | 531.4                                         | 180.20 | 143.63 | 912.69  | 235.66                                         | 99.68  | 80.53  | 503.98 |
| <b>Processed meat KC/d</b>                     | 15.30                                         | 12.20  | 0.61   | 61.09   | 3.70                                           | 4.95   | 0.22   | 18.12  |
| <b>Red meat KC/d</b>                           | 90.72                                         | 48.06  | 12.03  | 235.95  | 36.82                                          | 29.40  | 7.07   | 172.00 |
| <b>Fish KC/d</b>                               | 49.54                                         | 92.63  | 2.85   | 370.36  | 4.56                                           | 2.69   | 0.78   | 12.97  |
| <b>Milk KC/d</b>                               | 55.64                                         | 35.39  | 7.70   | 146.82  | 25.61                                          | 16.78  | 1.06   | 75.87  |
| <b>Poultry KC/d available</b>                  | 90.44                                         | 47.27  | 4.74   | 240.56  | 30.23                                          | 22.39  | 2.78   | 100.04 |
| <b>Eggs KC/d available</b>                     | 36.63                                         | 11.25  | 4.77   | 69.64   | 14.73                                          | 13.63  | 1.51   | 46.81  |
| <b>Added Saturated fatty acids KC/d</b>        | 113.40                                        | 36.53  | 59.52  | 221.29  | 87.22                                          | 24.03  | 33.03  | 205.85 |
| <b>Added PUFAs KC/d</b>                        | 69.80                                         | 35.78  | 15.77  | 175.40  | 25.48                                          | 14.54  | 2.73   | 84.90  |
| <b>Added Trans fatty acids KC/d</b>            | 9.91                                          | 9.25   | 1.65   | 34.90   | 7.31                                           | 8.62   | 1.21   | 35.77  |
| <b>Alcohol KC/d</b>                            | 119.72                                        | 66.67  | 4.25   | 296.70  | 45.83                                          | 46.24  | 5.77   | 340.37 |
| <b>Sugary beverages KC/d</b>                   | 320.29                                        | 251.94 | 72.91  | 1472.00 | 303.30                                         | 63.68  | 180.80 | 685.42 |
| <b>Potatoes KC/d available</b>                 | 81.34                                         | 51.14  | 9.50   | 177.30  | 98.34                                          | 96.77  | 3.94   | 533.88 |
| <b>Corn KC/d available</b>                     | 48.19                                         | 75.26  | 1.79   | 287.14  | 31.77                                          | 37.30  | 0.20   | 305.17 |
| <b>Fruits KC/d</b>                             | 64.84                                         | 16.49  | 23.05  | 128.61  | 31.23                                          | 13.93  | 3.58   | 70.11  |
| <b>Vegetables KC/d</b>                         | 108.02                                        | 44.60  | 9.48   | 214.26  | 83.83                                          | 56.67  | 14.43  | 198.51 |
| <b>Nuts and seeds KC/d</b>                     | 15.90                                         | 10.50  | 0.66   | 39.80   | 4.81                                           | 2.91   | 0.05   | 17.91  |
| <b>Whole grains KC/d</b>                       | 64.71                                         | 38.62  | 1.61   | 173.46  | 28.30                                          | 33.01  | 1.14   | 156.75 |
| <b>Legumes KC/d</b>                            | 47.88                                         | 25.99  | 2.95   | 133.26  | 31.55                                          | 18.93  | 0.51   | 103.17 |
| <b>Rice KC/d available</b>                     | 78.10                                         | 97.95  | 7.58   | 349.08  | 75.93                                          | 107.38 | 1.42   | 461.80 |
| <b>Sweet potatoes KC/d available</b>           | 3.92                                          | 5.14   | 0.04   | 27.51   | 5.84                                           | 20.20  | 0.02   | 364.74 |
| <b>Total KC/d available</b>                    | 2972                                          | 409    | 1948   | 3572    | 2627                                           | 409    | 1579   | 3254   |
| <b>Vit A deficiency children/100k/yr</b>       | 14181                                         | 8723   | 1400   | 44100   | 20559                                          | 11395  | 1722   | 50969  |
| <b>Sodium g/d</b>                              | 3.92                                          | 1.22   | 1.33   | 6.70    | 3.30                                           | 0.76   | 1.33   | 5.96   |
| <b>Calcium g/d</b>                             | 0.506                                         | 0.189  | 0.183  | 1.044   | 0.321                                          | 0.150  | 0.089  | 0.792  |
| <b>Dietary fiber g/d</b>                       | 10.58                                         | 2.90   | 5.15   | 17.95   | 9.53                                           | 3.32   | 3.87   | 18.83  |
| <b>Physical activity METs</b>                  | 3802                                          | 1164   | 2162   | 7607    | 4273                                           | 1497   | 1838   | 7607   |
| <b>Child underweight &gt;2SD</b>               | 0.038                                         | 0.043  | 0.004  | 0.242   | 0.186                                          | 0.141  | 0.011  | 0.411  |
| <b>Stop breast feeding &lt;6 mo</b>            | 0.176                                         | 0.032  | 0.071  | 0.218   | 0.116                                          | 0.044  | 0.036  | 0.208  |
| <b>Ambient pollution PM<sub>0.25</sub></b>     | 17.60                                         | 8.27   | 4.38   | 38.42   | 40.81                                          | 22.19  | 7.90   | 77.69  |
| <b>Smoking rate (0-1)</b>                      | 0.217                                         | 0.121  | 0.012  | 0.448   | 0.212                                          | 0.190  | 0.005  | 0.627  |
| <b>Secondhand smoking (0-1)</b>                | 0.328                                         | 0.097  | 0.164  | 0.569   | 0.397                                          | 0.158  | 0.164  | 0.780  |
| <b>Sublingual tobacco rate (0-1)</b>           | 0.010                                         | 0.015  | 0.001  | 0.111   | 0.060                                          | 0.072  | 0.001  | 0.238  |
| <b>Blood lead level mcg/dl</b>                 | 4.08                                          | 1.00   | 1.22   | 6.85    | 4.74                                           | 1.28   | 1.92   | 8.37   |
| <b>Household air pollution (0-1)</b>           | 0.103                                         | 0.182  | 0.001  | 0.839   | 0.404                                          | 0.353  | 0.002  | 0.993  |
| <b>Kidney disease stage III (0-1)</b>          | 0.042                                         | 0.020  | 0.015  | 0.111   | 0.078                                          | 0.024  | 0.035  | 0.139  |
| <b>Type 1 DM early deaths</b>                  | 4.79                                          | 3.88   | 0.59   | 20.65   | 16.38                                          | 15.31  | 2.62   | 112.49 |
| <b>Type 2 DM early deaths</b>                  | 15.69                                         | 18.23  | 0.75   | 87.92   | 23.65                                          | 24.88  | 0.89   | 269.67 |
| <b>BMI kg/M<sup>2</sup></b>                    | 23.74                                         | 1.60   | 19.61  | 27.06   | 22.46                                          | 2.15   | 17.95  | 26.08  |
| <b>Fasting plasma glucose mmol/L</b>           | 4.56                                          | 0.25   | 3.54   | 5.12    | 4.28                                           | 0.42   | 3.38   | 5.18   |
| <b>Systolic BP mm Hg</b>                       | 133.26                                        | 4.41   | 123.41 | 142.15  | 136.86                                         | 4.39   | 124.59 | 147.89 |
| <b>Socio-demographic index (0-1)</b>           | 0.757                                         | 0.125  | 0.351  | 0.896   | 0.497                                          | 0.183  | 0.186  | 0.824  |
| <b>Sex male 1 and female 2</b>                 | 1.50                                          | 0.50   | 1.00   | 2.00    | 1.50                                           | 0.50   | 1.00   | 2.00   |

508 **Table 3. CVD related to fat-soluble vitamin related risk factors in low CVD countries**

| CVD lowest Countries (n=1000 cohorts), Table 3 | n cohorts | CVD ascending order | FSVV   | Processed meat | Red meat | Fish   | Milk   | Poultry | Eggs  | Added SFA +PUFA +TFA |
|------------------------------------------------|-----------|---------------------|--------|----------------|----------|--------|--------|---------|-------|----------------------|
| Japan                                          | 158       | 169.19              | 618.69 | 19.19          | 58.72    | 260.54 | 29.04  | 63.93   | 52.23 | 135.04               |
| France                                         | 64        | 174.00              | 644.78 | 13.59          | 135.07   | 11.17  | 95.75  | 99.86   | 43.30 | 246.04               |
| Switzerland                                    | 8         | 175.04              | 558.41 | 11.50          | 129.01   | 6.75   | 110.90 | 55.57   | 31.20 | 213.47               |
| Andorra                                        | 2         | 185.55              | 763.18 | 16.58          | 150.84   | 16.44  | 99.23  | 189.92  | 47.55 | 242.62               |
| Peru                                           | 32        | 197.74              | 183.12 | 1.01           | 16.92    | 3.82   | 15.34  | 35.04   | 12.03 | 98.95                |
| Spain                                          | 46        | 206.25              | 597.93 | 11.65          | 139.92   | 10.28  | 82.99  | 113.88  | 43.35 | 195.86               |
| Italy                                          | 60        | 206.44              | 587.57 | 15.78          | 126.36   | 9.15   | 89.54  | 84.16   | 36.39 | 226.20               |
| Iceland                                        | 2         | 206.51              | 609.62 | 11.97          | 112.73   | 11.67  | 85.37  | 63.57   | 29.51 | 294.81               |
| Australia                                      | 24        | 208.03              | 698.26 | 9.79           | 164.14   | 14.15  | 97.05  | 153.33  | 24.92 | 234.89               |
| Canada                                         | 36        | 222.11              | 624.98 | 25.31          | 126.28   | 18.48  | 76.13  | 147.46  | 34.94 | 196.39               |
| Israel                                         | 8         | 228.32              | 662.00 | 5.95           | 59.50    | 15.35  | 68.79  | 240.56  | 40.54 | 231.30               |
| South Korea                                    | 50        | 232.63              | 357.23 | 5.97           | 82.88    | 5.96   | 15.72  | 43.10   | 26.89 | 176.71               |
| Belgium                                        | 12        | 235.98              | 636.39 | 12.28          | 122.36   | 11.19  | 93.44  | 85.00   | 33.28 | 278.86               |
| Netherlands                                    | 18        | 236.61              | 629.56 | 15.72          | 133.06   | 8.66   | 114.16 | 72.70   | 41.67 | 243.59               |
| Taiwan                                         | 24        | 237.37              | 587.36 | 3.01           | 106.58   | 9.15   | 15.95  | 132.38  | 34.87 | 285.41               |
| Mexico                                         | 108       | 237.55              | 413.25 | 11.29          | 63.03    | 8.69   | 34.29  | 85.85   | 39.92 | 170.19               |
| Panama                                         | 4         | 244.31              | 383.83 | 2.75           | 61.32    | 9.44   | 20.72  | 95.43   | 12.96 | 181.23               |
| Sweden                                         | 10        | 247.21              | 563.83 | 29.31          | 119.77   | 11.80  | 124.13 | 45.42   | 35.04 | 198.37               |
| New Zealand non Mauri                          | 4         | 247.32              | 699.81 | 9.31           | 158.86   | 11.56  | 88.74  | 128.14  | 40.24 | 262.95               |
| Norway                                         | 32        | 248.72              | 605.30 | 48.14          | 109.37   | 10.10  | 100.96 | 41.65   | 31.52 | 263.56               |
| England                                        | 20        | 253.09              | 534.56 | 19.21          | 96.29    | 10.70  | 87.80  | 89.30   | 32.90 | 198.36               |
| Costa Rica                                     | 4         | 260.73              | 408.42 | 2.63           | 51.74    | 8.12   | 46.55  | 78.05   | 28.17 | 193.14               |
| Luxembourg                                     | 2         | 262.53              | 578.00 | 14.65          | 163.17   | 11.79  | 91.99  | 71.48   | 27.60 | 197.32               |
| Chile                                          | 18        | 267.50              | 404.12 | 19.11          | 90.33    | 9.65   | 31.93  | 97.29   | 19.70 | 136.10               |
| Guatemala                                      | 16        | 269.85              | 231.05 | 1.89           | 20.05    | 5.28   | 13.32  | 53.94   | 30.46 | 106.12               |
| Kenya                                          | 12        | 270.04              | 150.04 | 1.41           | 25.83    | 3.09   | 18.89  | 4.74    | 4.77  | 91.31                |
| Ecuador                                        | 16        | 270.64              | 375.35 | 6.87           | 56.88    | 7.34   | 35.51  | 59.92   | 14.66 | 194.16               |
| USA                                            | 94        | 274.00              | 825.54 | 36.45          | 136.35   | 15.79  | 90.90  | 190.90  | 41.10 | 314.05               |
| Denmark                                        | 6         | 275.10              | 600.48 | 14.46          | 137.75   | 13.38  | 98.01  | 74.42   | 45.96 | 216.51               |
| Austria                                        | 8         | 277.67              | 621.00 | 8.95           | 194.65   | 9.26   | 98.68  | 70.00   | 39.96 | 199.50               |
| Portugal                                       | 10        | 278.50              | 524.81 | 5.16           | 124.77   | 8.77   | 79.43  | 94.26   | 24.18 | 188.25               |
| Nicaragua                                      | 6         | 282.04              | 214.24 | 1.52           | 14.93    | 4.07   | 20.66  | 41.76   | 17.41 | 113.90               |
| Tehran (Iran)                                  | 16        | 283.29              | 299.65 | 1.23           | 22.63    | 5.36   | 19.23  | 65.90   | 18.89 | 166.41               |
| Thailand                                       | 70        | 289.91              | 247.43 | 0.70           | 32.01    | 6.95   | 7.85   | 57.07   | 31.10 | 111.75               |
| Total cohorts                                  | 1000      |                     |        |                |          |        |        |         |       |                      |

509

510

511 **Table 4. Representative examples of low CVD countries (n=1000 cohorts) including all risk**  
 512 **factors**

| <b>CVD and CVD risk factors</b>            | <b>Japan</b>   | <b>France</b> | <b>Peru</b>                 | <b>Mexico</b>  | <b>Panama</b>             | <b>Guatemala</b>  | <b>Ecuador</b>         |
|--------------------------------------------|----------------|---------------|-----------------------------|----------------|---------------------------|-------------------|------------------------|
| <b>n cohorts</b>                           | 158            | 64            | 32                          | 108            | 4                         | 16                | 16                     |
| <b>CVD/100k/year ages 15-69</b>            | 169.19         | 174.00        | 197.74                      | 237.55         | 244.31                    | 269.85            | 270.64                 |
| <b>Fat-soluble vitamin variable</b>        | 618.69         | 644.78        | 183.12                      | 413.25         | 383.83                    | 231.05            | 375.35                 |
| <b>LDL cholesterol mmol/L</b>              | 2.81           | 3.08          | 2.37                        | 2.59           | 2.61                      | 2.20              | 2.46                   |
| <b>Processed meat KC/d</b>                 | 19.19          | 13.59         | 1.01                        | 11.29          | 2.75                      | 1.89              | 6.87                   |
| <b>Red meat KC/d</b>                       | 58.72          | 135.07        | 16.92                       | 63.03          | 61.32                     | 20.05             | 56.88                  |
| <b>Fish KC/d</b>                           | 260.54         | 11.17         | 3.82                        | 8.69           | 9.44                      | 5.28              | 7.34                   |
| <b>Milk KC/d</b>                           | 29.04          | 95.75         | 15.34                       | 34.29          | 20.72                     | 13.32             | 35.51                  |
| <b>Poultry KC/d available</b>              | 63.93          | 99.86         | 35.04                       | 85.85          | 95.43                     | 53.94             | 59.92                  |
| <b>Eggs KC/d available</b>                 | 52.23          | 43.30         | 12.03                       | 39.92          | 12.96                     | 30.46             | 14.66                  |
| <b>Added Saturated fatty acids KC/d</b>    | 77.73          | 172.79        | 68.34                       | 89.13          | 101.32                    | 60.62             | 133.54                 |
| <b>Added PUFAs KC/d</b>                    | 53.78          | 67.38         | 24.47                       | 52.14          | 72.29                     | 41.90             | 51.69                  |
| <b>Added Trans fatty acids KC/d</b>        | 3.54           | 5.88          | 6.13                        | 28.92          | 7.62                      | 3.60              | 8.93                   |
| <b>Alcohol KC/d</b>                        | 183.16         | 118.64        | 55.79                       | 58.39          | 27.44                     | 28.79             | 59.77                  |
| <b>Sugary beverages KC/d</b>               | 94.78          | 323.88        | 284.76                      | 847.81         | 921.54                    | 964.08            | 283.57                 |
| <b>Potatoes KC/d available</b>             | 42.29          | 126.40        | 142.55                      | 25.79          | 32.01                     | 16.68             | 67.56                  |
| <b>Corn KC/d available</b>                 | 27.58          | 23.85         | 33.54                       | 242.41         | 50.86                     | 206.19            | 11.76                  |
| <b>Fruits KC/d</b>                         | 44.43          | 59.56         | 52.27                       | 65.68          | 52.92                     | 39.61             | 107.07                 |
| <b>Vegetables KC/d</b>                     | 149.32         | 101.07        | 46.17                       | 60.72          | 27.81                     | 54.98             | 31.79                  |
| <b>Nuts and seeds KC/d</b>                 | 9.26           | 16.94         | 1.02                        | 6.27           | 1.92                      | 12.72             | 0.68                   |
| <b>Whole grains KC/d</b>                   | 76.05          | 16.16         | 58.94                       | 142.06         | 83.46                     | 68.32             | 43.78                  |
| <b>Legumes KC/d</b>                        | 71.84          | 17.07         | 45.78                       | 76.99          | 38.35                     | 73.84             | 21.99                  |
| <b>Rice KC/d available</b>                 | 124.52         | 12.09         | 93.09                       | 14.07          | 141.66                    | 13.46             | 118.02                 |
| <b>Sweet potatoes KC/d available</b>       | 12.09          | 0.04          | 7.94                        | 0.69           | 8.67                      | 1.71              | 0.49                   |
| <b>Total KC/d available</b>                | 2590           | 3406          | 1948                        | 3015           | 2288                      | 2330              | 2273                   |
| <b>Vit A deficiency children/100k/yr</b>   | 8151           | 1643          | 19372                       | 23939          | 11463                     | 17947             | 20185                  |
| <b>Sodium g/d</b>                          | 6.01           | 3.21          | 3.14                        | 2.62           | 2.97                      | 1.83              | 3.16                   |
| <b>Calcium g/d</b>                         | 0.425          | 0.707         | 0.299                       | 0.370          | 0.293                     | 0.220             | 0.314                  |
| <b>Dietary fiber g/d</b>                   | 13.43          | 8.68          | 9.44                        | 15.51          | 5.90                      | 12.54             | 6.25                   |
| <b>Physical activity METs</b>              | 3460           | 2795          | 3774                        | 3833           | 4935                      | 6142              | 3740                   |
| <b>Child underweight &gt;2SD</b>           | 0.045          | 0.012         | 0.069                       | 0.050          | 0.042                     | 0.193             | 0.096                  |
| <b>Stop breast feeding &lt;6 months</b>    | 0.171          | 0.208         | 0.108                       | 0.171          | 0.140                     | 0.087             | 0.130                  |
| <b>Ambient pollution PM<sub>0.25</sub></b> | 13.10          | 13.87         | 28.99                       | 24.28          | 13.24                     | 28.61             | 17.86                  |
| <b>Smoking rate (0-1)</b>                  | 0.268          | 0.289         | 0.075                       | 0.149          | 0.073                     | 0.077             | 0.080                  |
| <b>Secondhand smoking (0-1)</b>            | 0.353          | 0.320         | 0.238                       | 0.344          | 0.178                     | 0.224             | 0.206                  |
| <b>Sublingual tobacco rate (0-1)</b>       | 0.012          | 0.003         | 0.004                       | 0.002          | 0.002                     | 0.001             | 0.004                  |
| <b>Blood lead level mcg/dl</b>             | 2.65           | 3.86          | 5.17                        | 5.34           | 4.80                      | 5.89              | 4.51                   |
| <b>Household air pollution (0-1)</b>       | 0.002          | 0.010         | 0.454                       | 0.213          | 0.193                     | 0.627             | 0.080                  |
| <b>Kidney disease stage III (0-1)</b>      | 0.038          | 0.028         | 0.050                       | 0.078          | 0.068                     | 0.075             | 0.055                  |
| <b>Type 1 DM early deaths</b>              | 1.25           | 2.91          | 4.84                        | 12.64          | 7.71                      | 12.03             | 6.92                   |
| <b>Type 2 DM early deaths</b>              | 2.03           | 3.70          | 11.37                       | 60.97          | 18.07                     | 40.38             | 27.44                  |
| <b>BMI kg/M<sup>2</sup></b>                | 21.89          | 23.47         | 23.29                       | 24.82          | 22.98                     | 21.97             | 25.04                  |
| <b>Fasting plasma glucose mmol/L</b>       | 4.77           | 4.46          | 4.01                        | 4.53           | 4.31                      | 4.12              | 4.26                   |
| <b>Systolic BP mm Hg</b>                   | 137.56         | 135.11        | 125.19                      | 130.31         | 133.66                    | 131.15            | 126.85                 |
| <b>Socio-demographic index</b>             | 0.828          | 0.822         | 0.590                       | 0.608          | 0.644                     | 0.431             | 0.575                  |
| <b>Likely mechanism of low CVD</b>         | FSVV<br>Plants | FSVV          | Low<br>smoking<br>metabolic | FSVV<br>Plants | FSVV PA<br>Low<br>smoking | PA Low<br>smoking | FSVV<br>Low<br>smoking |

513

514

515 **Table 5. CVD and risk factors for countries with FSVV  $\geq 567.27$  KC/d (n=974 cohorts)**

| CVD and CVD risk factors                   | Mean    | SD     | Min     | Max     | r      | 95% CI low | 95% CI high | p      |
|--------------------------------------------|---------|--------|---------|---------|--------|------------|-------------|--------|
| Cardiovascular deaths/100k/year ages 15-69 | 273.72  | 143.95 | 73.47   | 913.18  |        |            |             |        |
| LDL cholesterol mmol/L                     | 2.91    | 0.14   | 2.36    | 3.20    | -0.254 | -0.312     | -0.194      | <.0001 |
| Fat-soluble vitamin variable               | 692.58  | 111.88 | 527.67  | 932.18  | 0.523  | 0.476      | 0.567       | <.0001 |
| Processed meat KC/d                        | 25.01   | 15.30  | 2.16    | 68.77   | 0.459  | 0.408      | 0.507       | <.0001 |
| Red meat KC/d                              | 122.16  | 41.41  | 43.65   | 235.95  | 0.655  | 0.618      | 0.690       | <.0001 |
| Fish KC/d                                  | 49.08   | 89.24  | 7.60    | 370.36  | -0.259 | -0.317     | -0.199      | <.0001 |
| Milk KC/d                                  | 78.58   | 26.14  | 14.60   | 146.82  | 0.185  | 0.123      | 0.245       | <.0001 |
| Poultry KC/d available                     | 129.97  | 60.21  | 41.65   | 411.87  | 0.366  | 0.311      | 0.419       | <.0001 |
| Eggs KC/d available                        | 40.80   | 7.25   | 14.59   | 69.64   | -0.242 | -0.301     | -0.182      | <.0001 |
| Saturated fatty acids KC/d                 | 299.88  | 66.83  | 129.39  | 481.07  | 0.193  | 0.132      | 0.253       | <.0001 |
| PUFAs KC/d                                 | 211.86  | 83.06  | 80.53   | 381.31  | 0.382  | 0.327      | 0.435       | <.0001 |
| Trans fatty acids KC/d                     | 25.17   | 17.82  | 4.23    | 66.89   | 0.224  | 0.163      | 0.283       | <.0001 |
| Alcohol KC/d                               | 155.02  | 65.23  | 11.92   | 429.81  | 0.475  | 0.425      | 0.522       | <.0001 |
| Sugary beverages KC/d                      | 231.66  | 121.92 | 72.91   | 769.89  | 0.332  | 0.274      | 0.386       | <.0001 |
| Potatoes KC/d available                    | 106.39  | 40.47  | 9.50    | 224.86  | 0.109  | 0.046      | 0.170       | 0.00   |
| Corn KC/d available                        | 19.45   | 9.41   | 1.79    | 47.39   | 0.086  | 0.024      | 0.148       | 0.01   |
| Fruits KC/d                                | 66.91   | 15.93  | 34.83   | 161.39  | -0.014 | -0.077     | 0.049       | 0.66   |
| Vegetables KC/d                            | 117.42  | 34.24  | 42.27   | 304.17  | -0.127 | -0.188     | -0.064      | <.0001 |
| Nuts and seeds KC/d                        | 21.98   | 8.91   | 0.85    | 102.99  | 0.177  | 0.115      | 0.237       | <.0001 |
| Whole grains KC/d                          | 52.11   | 20.93  | 1.61    | 92.45   | 0.121  | 0.059      | 0.183       | 0.00   |
| Legumes KC/d                               | 40.76   | 25.29  | 2.95    | 133.26  | 0.040  | -0.023     | 0.102       | 0.21   |
| Rice KC/d available                        | 38.82   | 46.75  | 6.50    | 179.63  | -0.138 | -0.199     | -0.076      | <.0001 |
| Sweet potatoes KC/d available              | 3.63    | 3.99   | 0.04    | 17.63   | -0.128 | -0.189     | -0.066      | <.0001 |
| Total KC/d available                       | 3219    | 292    | 2516    | 3898    | 0.249  | 0.189      | 0.307       | <.0001 |
| Vit A deficiency children/100k/yr          | 9316    | 6877   | 1400    | 28081   | -0.105 | -0.166     | -0.042      | 0.00   |
| Sodium g/d                                 | 3.98    | 0.96   | 2.22    | 6.70    | -0.040 | -0.102     | 0.023       | 0.21   |
| Calcium g/d                                | 0.645   | 0.129  | 0.353   | 1.044   | 0.396  | 0.342      | 0.448       | <.0001 |
| Dietary fiber g/d                          | 10.62   | 1.75   | 6.30    | 18.15   | 0.241  | 0.181      | 0.299       | <.0001 |
| Physical activity METs                     | 3523    | 765    | 1781    | 5494    | 0.578  | 0.535      | 0.618       | <.0001 |
| Child underweight >2SD                     | 0.015   | 0.013  | 0.004   | 0.058   | -0.197 | -0.257     | -0.136      | <.0001 |
| Stop breast feeding <6 months              | 0.196   | 0.017  | 0.129   | 0.219   | 0.268  | 0.208      | 0.325       | <.0001 |
| Ambient pollution PM <sub>0.25</sub>       | 12.67   | 7.13   | 4.38    | 87.22   | 0.005  | -0.058     | 0.068       | 0.87   |
| Smoking rate (0-1)                         | 0.233   | 0.084  | 0.021   | 0.444   | 0.233  | 0.172      | 0.291       | <.0001 |
| Secondhand smoking (0-1)                   | 0.309   | 0.070  | 0.201   | 0.586   | -0.306 | -0.362     | -0.248      | <.0001 |
| Sublingual tobacco rate (0-1)              | 0.013   | 0.020  | 0.001   | 0.125   | 0.579  | 0.536      | 0.620       | <.0001 |
| Blood lead level mcg/dl                    | 3.93    | 0.77   | 1.22    | 5.72    | 0.451  | 0.400      | 0.500       | <.0001 |
| Household air pollution (0-1)              | 0.012   | 0.026  | 0.000   | 0.201   | -0.011 | -0.073     | 0.052       | 0.74   |
| Kidney disease stage III (0-1)             | 0.036   | 0.012  | 0.016   | 0.109   | -0.028 | -0.090     | 0.035       | 0.39   |
| Type 1 DM early deaths                     | 3.93    | 2.67   | 0.55    | 15.97   | 0.573  | 0.529      | 0.613       | <.0001 |
| Type 2 DM early deaths                     | 9.54    | 7.52   | 0.75    | 54.22   | 0.622  | 0.582      | 0.659       | <.0001 |
| BMI kg/M <sup>2</sup>                      | 24.87   | 1.78   | 21.40   | 29.39   | 0.484  | 0.434      | 0.530       | <.0001 |
| Fasting plasma glucose mmol/L              | 4.73    | 0.23   | 3.84    | 5.58    | 0.091  | 0.028      | 0.153       | 0.00   |
| Systolic BP mm Hg                          | 133.639 | 4.362  | 126.863 | 142.147 | -0.148 | -0.209     | -0.086      | <.0001 |
| Socio-demographic index (0-1)              | 0.838   | 0.053  | 0.592   | 0.896   | -0.052 | -0.114     | 0.011       | 0.11   |
| Sex male 1 and female 2                    | 1.50    | 0.50   | 1.00    | 2.00    | -0.745 | -0.772     | -0.716      | <.0001 |

516  
517

518 **Figure 1. LDLc versus CVD scatter plot**

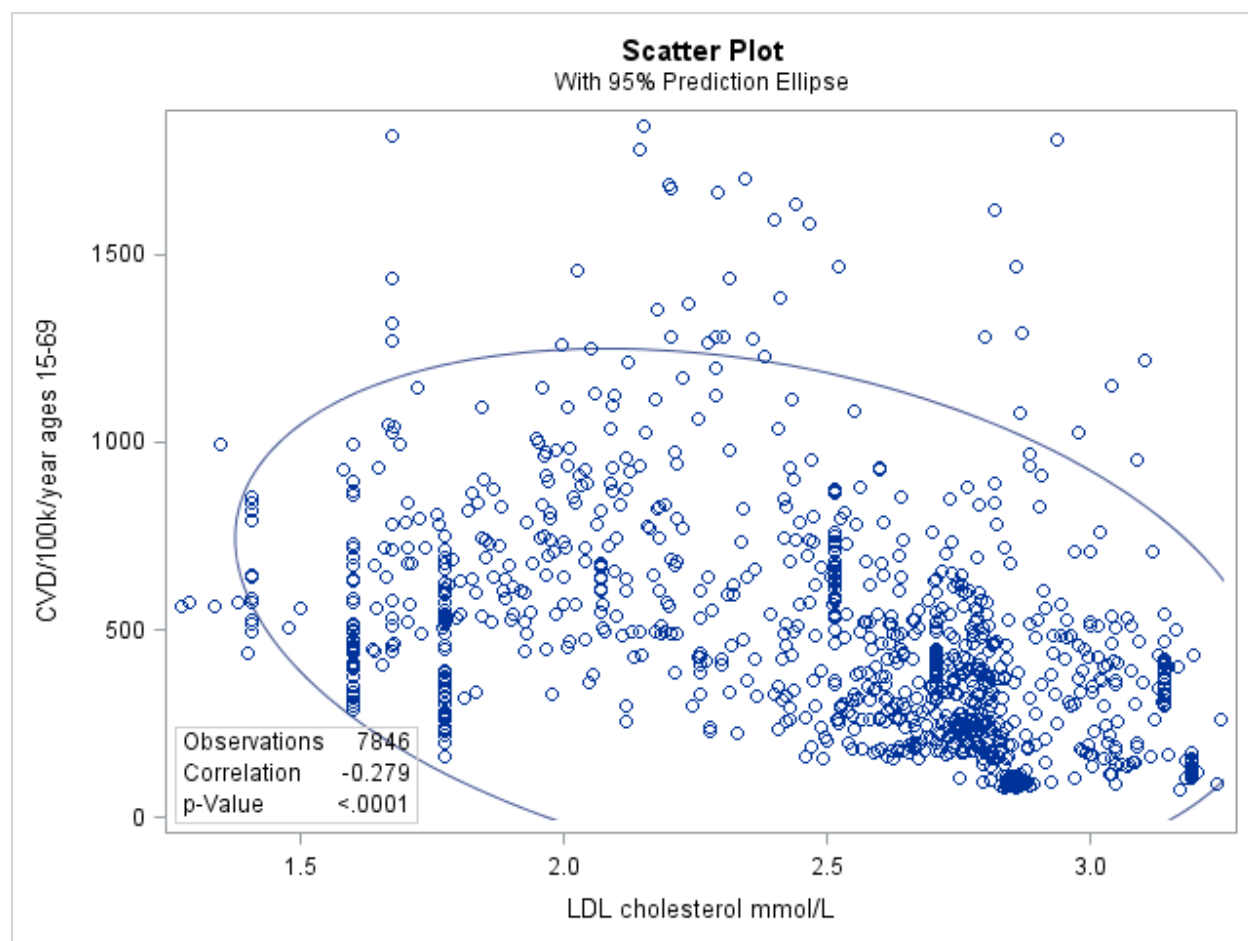

519

520 **Supplementary Table 1. Definitions of GBD risk factors and covariates related to CVD**

| <b>Variables</b>                                | <b>Definition</b>                                                                                                                                                                                                                                                                                                                 |
|-------------------------------------------------|-----------------------------------------------------------------------------------------------------------------------------------------------------------------------------------------------------------------------------------------------------------------------------------------------------------------------------------|
| <b>Alcohol</b>                                  | Any alcohol consumption (g/day)                                                                                                                                                                                                                                                                                                   |
| <b>Ambient particulate matter pollution</b>     | Annual average daily exposure to outdoor air concentrations of particulate matter with an aerodynamic diameter of $\leq 2.5 \mu\text{g}/\text{m}^3$ (PM <sub>2.5</sub> )                                                                                                                                                          |
| <b>Body-mass index</b>                          | Body mass index (BMI) (kg/m <sup>2</sup> )—the dependent variable of interest                                                                                                                                                                                                                                                     |
| <b>Chewing tobacco</b>                          | Current use of any chewing tobacco product                                                                                                                                                                                                                                                                                        |
| <b>Child underweight</b>                        | Proportion of children – 3 SD to – 2 SD of the WHO 2006 standard weight-for-age curve (0-1)                                                                                                                                                                                                                                       |
| <b>Corn</b>                                     | Corn availability per capita (g/day), a covariate                                                                                                                                                                                                                                                                                 |
| <b>Discontinued breast feeding</b>              | Proportion of children aged 6-23 months who do not receive any breast milk                                                                                                                                                                                                                                                        |
| <b>Eggs</b>                                     | Eggs availability per capita (g/day) a covariate                                                                                                                                                                                                                                                                                  |
| <b>Fasting plasma glucose</b>                   | Fasting plasma glucose (mmol/L)                                                                                                                                                                                                                                                                                                   |
| <b>Fish</b>                                     | This variable expressed in g/day was derived by determining the weight of fish in g corresponding to 1 g of omega-3 fatty acids (eicosapentaenoic acid and docosahexaenoic acid) by averaging the fish g per 1 g of omega-3 fatty acids 20 species of fish= 117.04 g/day fish/1 g/day omega-3 fatty acids (Supplementary Table 3) |
| <b>Fruits</b>                                   | Consumption of fruits (includes fresh, frozen, cooked, canned, or dried fruit but excludes fruit juices and salted or pickled fruits) (g/day)                                                                                                                                                                                     |
| <b>Household air pollution from solid fuels</b> | Individual exposure to PM <sub>2.5</sub> due to use of solid cooking fuel                                                                                                                                                                                                                                                         |
| <b>Kidney function impaired</b>                 | Proportion of the population with ACR >30 mg/g or GFR <60 mL/min/1.73 m <sup>2</sup> , excluding end-stage renal disease                                                                                                                                                                                                          |
| <b>Kilocalories available /day</b>              | The mean number of kilocalories per capita available per day to people in each location (kcal/day available), a covariate                                                                                                                                                                                                         |
| <b>LDL cholesterol</b>                          | Serum low-density lipoprotein cholesterol (mmol/L)                                                                                                                                                                                                                                                                                |
| <b>Lead exposure</b>                            | Blood lead levels in $\mu\text{g}/\text{dL}$ of blood, bone lead levels in $\mu\text{g}/\text{g}$ of bone                                                                                                                                                                                                                         |
| <b>Legumes</b>                                  | Consumption of beans, lentils, pulses (g/day)                                                                                                                                                                                                                                                                                     |
| <b>Milk</b>                                     | Consumption of milk including non-fat, low-fat, and full-fat milk but excluding soy milk and other plant derivatives (g/day)                                                                                                                                                                                                      |
| <b>Nuts and seeds</b>                           | Consumption of nuts and seeds (g/day)                                                                                                                                                                                                                                                                                             |
| <b>Physical activity</b>                        | Average weekly physical activity at work, home, transport-related and recreational measured by MET min per week. Less than 3000 METs per week constitutes low physical activity.                                                                                                                                                  |
| <b>Poultry</b>                                  | Poultry availability per capita (g/day), a covariate                                                                                                                                                                                                                                                                              |
| <b>Potatoes</b>                                 | Potatoes availability per capita (g/day), a covariate                                                                                                                                                                                                                                                                             |
| <b>Processed meat</b>                           | Consumption of any processed meat (includes meat preserved by smoking, curing, salting, or addition of chemical preservatives, including bacon, salami, sausages, or deli or luncheon meats like ham, turkey, and pastrami) (g/day)                                                                                               |
| <b>Red meat</b>                                 | Consumption of red meat (includes beef, pork, lamb, and goat but excludes poultry, fish, eggs, and all processed meats) (g/day)                                                                                                                                                                                                   |
| <b>Rice</b>                                     | Rice availability per capita (g/day), a covariate                                                                                                                                                                                                                                                                                 |
| <b>Seafood omega-3 fatty acids</b>              | Seafood omega-3 fatty acids (eicosapentaenoic acid and docosahexaenoic acid) in tablet or fish form (g/day)                                                                                                                                                                                                                       |
| <b>Second-hand smoke</b>                        | Average daily exposure to air particulate matter from second-hand smoke with an aerodynamic diameter smaller than 2.5 $\mu\text{g}$ , measured in $\mu\text{g}/\text{m}^3$ , among non-smokers                                                                                                                                    |
| <b>Smoking</b>                                  | Prevalence of current use of any smoked tobacco product and prevalence of former use of any smoked tobacco product; among current smokers, cigarette equivalents smoked per smoker per day and cumulative pack-years of exposure; among former smokers, number of years since quitting                                            |
| <b>Socio-demographic index</b>                  | SDI is a composite indicator of development status that was originally constructed for GBD 2015 and is derived from components that correlate strongly with health outcomes.                                                                                                                                                      |



|                                  |                                                                                                                                                                                                                                                                                                        |
|----------------------------------|--------------------------------------------------------------------------------------------------------------------------------------------------------------------------------------------------------------------------------------------------------------------------------------------------------|
|                                  | It is the geometric mean for indices of the total fertility rate among women younger than 25 years, mean education for those aged 15 years or older, and lag-distributed income per capita. The resulting metric ranges from 0 to 1, with higher values corresponding to higher levels of development. |
| <b>Sugar-sweetened beverages</b> | Consumption of any beverage with $\geq 50$ calories of sugar per one-cup serving, including carbonated beverages, sodas, energy drinks, fruit drinks but excluding 100% fruit and vegetable juices (g/day)                                                                                             |
| <b>Sweet potatoes</b>            | Sweet potato availability per capita (g/day), a covariate                                                                                                                                                                                                                                              |
| <b>Systolic blood pressure</b>   | Systolic blood pressure (mm Hg)                                                                                                                                                                                                                                                                        |
| <b>Total sugar</b>               | Total sugar availability per capita (g/day), a covariate                                                                                                                                                                                                                                               |
| <b>Vegetables</b>                | Consumption of frozen, cooked, canned, or dried vegetables (including legumes but excluding salted or pickled, juices, nuts and seeds, and starchy vegetables such as potatoes or corn) (g/day)                                                                                                        |
| <b>Vitamin A deficiency</b>      | Proportion of children aged 0–5 years with serum retinol concentration $< 0.7 \mu\text{mol/L}$                                                                                                                                                                                                         |
| <b>Whole grains</b>              | Consumption of whole grains (bran, germ, and endosperm in their natural proportions) from breakfast cereals, bread, rice, pasta, biscuits, muffins, tortillas, pancakes, and others (g/day)                                                                                                            |

521

522 **Supplementary Table 2. STROBE 2007 (v4) Statement—Checklist of items that should be**  
 523 **included in reports of cohort studies**

| Section/Topic             | Item # | Recommendation                                                                                                                                                                                       | Reported on page #            |
|---------------------------|--------|------------------------------------------------------------------------------------------------------------------------------------------------------------------------------------------------------|-------------------------------|
| <b>Title and abstract</b> | 1      | (a) Indicate the study’s design with a commonly used term in the title or the abstract                                                                                                               | 1                             |
|                           |        | (b) Provide in the abstract an informative and balanced summary of what was done and what was found                                                                                                  | 2-3                           |
| <b>Introduction</b>       |        |                                                                                                                                                                                                      |                               |
| Background/rationale      | 2      | Explain the scientific background and rationale for the investigation being reported                                                                                                                 | 4-7                           |
| Objectives                | 3      | State specific objectives, including any prespecified hypotheses                                                                                                                                     | 7                             |
| <b>Methods</b>            |        |                                                                                                                                                                                                      |                               |
| Study design              | 4      | Present key elements of study design early in the paper                                                                                                                                              | 7-9                           |
| Setting                   | 5      | Describe the setting, locations, and relevant dates, including periods of recruitment, exposure, follow-up, and data collection                                                                      | 7-9                           |
| Participants              | 6      | (a) Give the eligibility criteria, and the sources and methods of selection of participants. Describe methods of follow-up                                                                           | 7-9                           |
|                           |        | (b) For matched studies, give matching criteria and number of exposed and unexposed                                                                                                                  | NA                            |
| Variables                 | 7      | Clearly define all outcomes, exposures, predictors, potential confounders, and effect modifiers. Give diagnostic criteria, if applicable                                                             | 10 and Supplementary Table 1  |
| Data sources/measurement  | 8      | For each variable of interest, give sources of data and details of methods of assessment (measurement). Describe comparability of assessment methods if there is more than one group                 | 8-9, Supplementary Tables 2-3 |
| Bias                      | 9      | Describe any efforts to address potential sources of bias                                                                                                                                            | 9                             |
| Study size                | 10     | Explain how the study size was arrived at                                                                                                                                                            | 9                             |
| Quantitative variables    | 11     | Explain how quantitative variables were handled in the analyses. If applicable, describe which groupings were chosen and why                                                                         | 10                            |
| Statistical methods       | 12     | (a) Describe all statistical methods, including those used to control for confounding                                                                                                                | 10-11                         |
|                           |        | (b) Describe any methods used to examine subgroups and interactions                                                                                                                                  | 10-11                         |
|                           |        | (c) Explain how missing data were addressed                                                                                                                                                          | 9                             |
|                           |        | (d) If applicable, explain how loss to follow-up was addressed                                                                                                                                       | NA                            |
|                           |        | (e) Describe any sensitivity analyses                                                                                                                                                                | NA                            |
| <b>Results</b>            |        |                                                                                                                                                                                                      |                               |
| Ecological data↓          | 13     | (a) Report numbers of individuals at each stage of study—e.g., numbers potentially eligible, examined for eligibility, confirmed eligible, included in the study, completing follow-up, and analysed | 8-9                           |
|                           |        | (b) Give reasons for non-participation at each stage                                                                                                                                                 | NA                            |
|                           |        | (c) Consider use of a flow diagram                                                                                                                                                                   | NA                            |
| Descriptive data          | 14     | (a) Give characteristics of study participants (e.g., demographic, clinical, social) and information on exposures and potential confounders                                                          | 9↓                            |
|                           |        | (b) Indicate number of participants with missing data for each variable of interest                                                                                                                  | NA                            |

|                          |    |                                                                                                                                                                                                              |                           |
|--------------------------|----|--------------------------------------------------------------------------------------------------------------------------------------------------------------------------------------------------------------|---------------------------|
|                          |    | (c) Summarise follow-up time (e.g., average and total amount)                                                                                                                                                | NA                        |
| Outcome data             | 15 | Report numbers of outcome events or summary measures over time                                                                                                                                               | Tables 1-5, 26-30         |
| Main results             | 16 | (a) Give unadjusted estimates and, if applicable, confounder-adjusted estimates and their precision (eg, 95% confidence interval). Make clear which confounders were adjusted for and why they were included | 15-17, Tables 1-5, 26-30, |
|                          |    | (b) Report category boundaries when continuous variables were categorized                                                                                                                                    | NA                        |
|                          |    | (c) If relevant, consider translating estimates of relative risk into absolute risk for a meaningful time period                                                                                             | NA                        |
| Other analyses           | 17 | Report other analyses done—e.g., analyses of subgroups and interactions, and sensitivity analyses                                                                                                            | 13-15                     |
| <b>Discussion</b>        |    |                                                                                                                                                                                                              |                           |
| Key results              | 18 | Summarize key results with reference to study objectives                                                                                                                                                     | 18-23                     |
| <b>Limitations</b>       |    |                                                                                                                                                                                                              |                           |
| Interpretation           | 20 | Give a cautious overall interpretation of results considering objectives, limitations, multiplicity of analyses, results from similar studies, and other relevant evidence                                   | 24-25                     |
| Generalisability         | 21 | Discuss the generalisability (external validity) of the study results                                                                                                                                        | 24                        |
| <b>Other information</b> |    |                                                                                                                                                                                                              |                           |
|                          |    | Data availability statement                                                                                                                                                                                  | 41                        |
| Funding                  | 22 | Give the source of funding and the role of the funders for the present study and, if applicable, for the original study on which the present article is based                                                | 40                        |

524  
525  
526  
527

↓Global Burden of Disease ecological data on worldwide male and female cohorts from IHME is the data source rather than individual participants

528 **Supplementary Table 3. Omega-3 Fatty Acid g to fish g calculation¶**

| <b>Fish</b>                                                | <b>DHA g/3-ounce fish</b> | <b>EPA g/3-ounce fish</b> | <b>Omega-3 Fatty Acids (DHA + EPA) g/3-ounce fish mean</b> | <b>Fish 3 ounces = 85.02 g</b> | <b>Fish (g) per omega-3 Fatty Acids (g)=85.02 / 0.7264</b> |
|------------------------------------------------------------|---------------------------|---------------------------|------------------------------------------------------------|--------------------------------|------------------------------------------------------------|
| <b>Salmon Atlantic farmed</b>                              | 1.24                      | 0.59                      |                                                            |                                |                                                            |
| <b>Salmon Atlantic wild</b>                                | 1.22                      | 0.35                      |                                                            |                                |                                                            |
| <b>Herring Atlantic</b>                                    | 0.94                      | 0.77                      |                                                            |                                |                                                            |
| <b>Sardines canned in tomato sauce drained</b>             | 0.74                      | 0.45                      |                                                            |                                |                                                            |
| <b>Mackerel Atlantic</b>                                   | 0.59                      | 0.43                      |                                                            |                                |                                                            |
| <b>Salmon pink canned drained</b>                          | 0.63                      | 0.28                      |                                                            |                                |                                                            |
| <b>Trout rainbow wild</b>                                  | 0.44                      | 0.40                      |                                                            |                                |                                                            |
| <b>Oysters eastern wild</b>                                | 0.23                      | 0.30                      |                                                            |                                |                                                            |
| <b>Sea bass</b>                                            | 0.47                      | 0.18                      |                                                            |                                |                                                            |
| <b>Shrimp</b>                                              | 0.12                      | 0.12                      |                                                            |                                |                                                            |
| <b>Lobster</b>                                             | 0.07                      | 0.10                      |                                                            |                                |                                                            |
| <b>Tuna light canned in water drained</b>                  | 0.17                      | 0.02                      |                                                            |                                |                                                            |
| <b>Tilapia</b>                                             | 0.11                      |                           |                                                            |                                |                                                            |
| <b>Scallops</b>                                            | 0.09                      | 0.06                      |                                                            |                                |                                                            |
| <b>Cod Pacific</b>                                         | 0.1                       | 0.04                      |                                                            |                                |                                                            |
| <b>Tuna yellowfin</b>                                      | 0.09                      | 0.01                      |                                                            |                                |                                                            |
| <b>Mean DHA and EPA Omega-3 Fatty Acids g/3 ounce fish</b> | 0.4531                    | 0.2733                    |                                                            |                                |                                                            |
| <b>Calculations total Omega-3 FA g to fish g</b>           |                           |                           | 0.7264                                                     | 85.02                          | 117.043                                                    |

529 ¶ Data on omega-3 fatty acid content of varieties of fish came from the National Institutes of  
 530 Health Office of Dietary Supplements (USA)  
 531

532

533

534 **Supplementary Table 4. Calculations of KC/d from g/day of animal and plant foods¶**

| <b>Foods</b>                     | <b>Food sub-categories</b> | <b>kcal/serving</b> | <b>g/serving</b> | <b>kcal/g</b> |
|----------------------------------|----------------------------|---------------------|------------------|---------------|
| <b>Milk (2% fat)</b>             |                            | 122                 | 244              | 0.5           |
| <b>Fish</b>                      |                            | 218                 | 170              | 1.28          |
| <b>Eggs</b>                      |                            | 72                  | 50               | 1.44          |
| <b>Poultry</b>                   |                            | 187                 | 85               | 2.91          |
| <b>Red meat</b>                  |                            | 247                 | 85               | 2.91          |
| <b>Processed meat</b>            |                            |                     |                  |               |
|                                  | <b>Salami</b>              | 222                 | 59               | 3.76          |
|                                  | <b>Pastrami</b>            | 104                 | 71               | 1.46          |
|                                  | <b>Ring baloney</b>        | 86                  | 28               | 3.07          |
|                                  | <b>Pepperoni</b>           | 94                  | 100              | 0.94          |
| <b>Average processed meat</b>    |                            | 126.5               | 64.5             | 1.96          |
| <b>Fruits</b>                    |                            | 97                  | 162              | 0.60          |
| <b>Vegetables</b>                |                            | 59                  | 91               | 0.65          |
| <b>Legumes</b>                   |                            | 249                 | 179              | 1.39          |
| <b>Nuts</b>                      |                            | 172                 | 28               | 6.14          |
| <b>Seeds</b>                     |                            |                     |                  |               |
|                                  | <b>Flax seeds</b>          | 55                  | 10               | 5.5           |
|                                  | <b>Chia seeds</b>          | 58                  | 12               | 4.83          |
|                                  | <b>Fennel seeds</b>        | 34.5                | 10               | 3.45          |
|                                  | <b>Hemp seeds</b>          | 55.3                | 10               | 5.53          |
| <b>Average of seeds</b>          |                            | 50.7                | 10.5             | 4.83          |
| <b>Average of nuts and seeds</b> |                            | 111.4               | 19.25            | 5.78          |
| <b>Corn</b>                      |                            | 99                  | 103              | 0.96          |
| <b>Potatoes</b>                  |                            | 161                 | 173              | 0.93          |
| <b>Sweet potatoes</b>            |                            | 115                 | 151              | 0.76          |
| <b>Rice</b>                      |                            | 205                 | 158              | 1.3           |
| <b>Whole grains</b>              |                            | 120                 | 52               | 2.31          |

535 ¶ Source: NutritionIX app<sup>25</sup>

536

537

## 538 **Acknowledgments**

539• **Authors' contributions:** DKC acts as guarantor; conceived and designed the study, acquired  
540 and analysed the data, interpreted the study findings, drafted the manuscript, critically reviewed  
541 and edited the manuscript and tables, and approved the final version for publication.

542

543 CW designed software programs in R to format and population weight the data,  
544 aided with the SAS statistical analysis, critically reviewed the manuscript, and  
545 approved the final version for publication.

546

547 The corresponding author attests that all listed authors meet authorship criteria and that no others  
548 meeting the criteria have been omitted.

549

550 **Copyright:** The authors retain the copyright to the paper

551

## 552 **The Patient and Public Involvement**

553 • When and how were patients/public first involved in the research?

554 IHME acquired, catalogued and extracted information from over 12,000 surveys from  
555 government and non-government agencies to compile the GBD database.

556 • How were the research question(s) developed and informed by their priorities,  
557 experience, and preferences?

558 The diverse surveys contributing to the GBD database had many different priorities and  
559 intentions unrelated to this post hoc analysis. The current analysis research questions have been

560 developed to give researchers, policymakers, and the public the methodological tool to quantify  
561 the impacts of dietary and other risk factor patterns.

562 ● How were patients/public involved in

563 (a) the design and conduct of the study?

564 The way patients/public were involved in the collection of the surveys has not been  
565 systematically studied and reported on. Patients/public are the intended beneficiaries of  
566 this analysis of the GBD data.

567 (b) choice of outcome measures?

568 The outcome measures chosen all relate to human health.

569 (c) recruitment to the study?

570 The recruitment methods vary by the survey.

571 ● How were (or will) patients/ public be involved in choosing the methods and agreeing  
572 plans for dissemination of the study results to participants and linked communities?

573 IHME and all the health surveyors that contributed will make these decisions. This analysis of  
574 the data will be available to all by open access.

575

576● **Competing interests statement:** Both authors have completed the ICMJE uniform disclosure  
577 form at [www.icmje.org/coi\\_disclosure.pdf](http://www.icmje.org/coi_disclosure.pdf) and declare: no support from any organisation for the  
578 submitted work; no financial relationships with any organisations that might have an interest in  
579 the submitted work in the previous three years; no other relationships or activities that could  
580 appear to have influenced the submitted work.

581

582 **Transparency declaration:** The manuscript is an honest, accurate, and transparent account of  
583 the study being reported. No important aspects of the study have been omitted. Any  
584 discrepancies from the study as planned have been explained.

585

586 **Ethics:** Studies based solely on data from IHME GBD database do not need approval from any  
587 bioethics committee.

588

589• **Funding:** This research received no grant from any funding agency in the public, commercial or  
590 not-for-profit sectors. The Bill and Melinda Gates Foundation funded the acquisition of the data  
591 for this analysis by the IHME. The data were provided to the authors as volunteer collaborators  
592 with IHME.

593•

594 **Details of the role of the study sponsors:** While IHME GBD faculty and staff by virtue of  
595 Gates Foundation grants provided the raw data for this analysis, they did not vet the analysis or  
596 sponsor the manuscript.

597

598 **Statement of independence of researchers from funders:** The researchers have received no  
599 funding. Gates Foundation funded IHME to collect or analyse the GBD data.

600

601 **Dissemination declaration:** Dissemination of this manuscript to the participants of the more  
602 than 12,000 surveys is not possible individually, but the information will become in the public  
603 domain.

604



605 **Disclosures:** We thank Scott Glenn and Brent Bell from IHME who supplied us with the GBD  
606 risk factor exposure data for the risk factors and for noncommunicable disease death data.

607•

608 **Ethics:** Studies were based solely on data from the IHME GBD database and do not need  
609 approval from any bioethics committee.

610

611 **Participant informed consents:** Not applicable.

612

613 **Author access to data:** As volunteer collaborators with the Institute of Health Metrics and  
614 Evaluation, we received about 1.4 gigabytes of raw data on noncommunicable disease deaths and  
615 32 relevant risk factors.

616

617 **Data sharing statement:** On acceptance for publication by the Lancet, our dataset and SAS  
618 codes will be posted on the Mendeley data repository (<https://data.mendeley.com/>).

619

620 **Protocol, submitted as a supplementary file:** Not applicable.

621

622 **STROBE checklist:** Submitted.

623

624 **Patient consent:** Not applicable.

625

626

## 627 References

- 628 1. Keys A, Menotti A, Karvonen MJ, et al. **The diet and 15-year death rate in the seven**  
629 **countries study.** *Am J Epidemiol.* 1986; **124** (6): 903-15.  
630 <https://academic.oup.com/aje/article-abstract/124/6/903/174332?redirectedFrom=fulltext>
- 631 2. DuBroff R. **A Reappraisal of the Lipid Hypothesis.** *The American Journal of*  
632 *Medicine.* 2018; **131** (9): 993-997. <https://doi.org/10.1016/j.amjmed.2018.04.027>
- 633 3. Teicholz N. **The scientific report guiding the US dietary guidelines: is it scientific?**  
634 *BMJ.* 2015; **351**. <http://www.bmj.com/bmj/351/bmj.h4962.full.pdf>
- 635 4. **Outcome of Post-publication review of article by Nina Teicholz.** *BMJ.* 2015; **351:**  
636 **h4962.** <https://www.bmj.com/content/351/bmj.h4962/rr-48>
- 637 5. Zile MH. **Vitamin A-not for your eyes only: requirement for heart formation begins**  
638 **early in embryogenesis.** *Nutrients.* 2010; **2** (5): 532-50.
- 639 6. Xing X, Tao F. **[Advance of study on vitamin A deficiency and excess associated**  
640 **with congenital heart disease].** *Wei Sheng Yan Jiu.* 2008; **37** (6): 754-6.
- 641 7. Saremi A, Arora R. **Vitamin E and cardiovascular disease.** *Am J Ther.* 2010; **17** (3):  
642 e56-65.
- 643 8. Beulens JWJ, Booth SL, van den Heuvel EGHM, Stoecklin E, Baka A, Vermeer C. **The**  
644 **role of menaquinones (vitamin K2) in human health.** *British Journal of Nutrition.*  
645 2013; **110:** 1357–1368. [https://www.cambridge.org/core/journals/british-journal-of-](https://www.cambridge.org/core/journals/british-journal-of-nutrition/article/the-role-of-menaquinones-vitamin-k2-in-human-health/5B9F317B526629D8BA77B6435F1E5509)  
646 [nutrition/article/the-role-of-menaquinones-vitamin-k2-in-human-](https://www.cambridge.org/core/journals/british-journal-of-nutrition/article/the-role-of-menaquinones-vitamin-k2-in-human-health/5B9F317B526629D8BA77B6435F1E5509)  
647 [health/5B9F317B526629D8BA77B6435F1E5509](https://www.cambridge.org/core/journals/british-journal-of-nutrition/article/the-role-of-menaquinones-vitamin-k2-in-human-health/5B9F317B526629D8BA77B6435F1E5509)
- 648 9. Wang L, Song Y, Manson JE, et al. **Circulating 25-Hydroxy-Vitamin D and Risk of**  
649 **Cardiovascular Disease: A Meta-Analysis of Prospective Studies.** *Circulation:*  
650 *Cardiovascular Quality and Outcomes.* 2012; **5** (6): 819-829.  
651 <http://circoutcomes.ahajournals.org/content/5/6/819.abstract>
- 652 10. Fu X, Harshman SG, Shen X, et al. **Multiple Vitamin K Forms Exist in Dairy Foods.**  
653 *Current developments in nutrition.* 2017; **1** (6): e000638-e000638.  
654 <https://www.ncbi.nlm.nih.gov/pmc/articles/PMC5998353/>
- 655 11. Walther B, Chollet M. Vitamin K2 - Vital for Health and Wellbeing. In: Gordeladze JO,  
656 ed. Menaquinones, Bacteria, and Foods: Vitamin K2 in the Die: IntechOpen, 2017.
- 657 12. Kamao M, Suhara Y, Tsugawa N, et al. **Vitamin K content of foods and dietary**  
658 **vitamin K intake in Japanese young women.** *J Nutr Sci Vitaminol (Tokyo).* 2007; **53**  
659 (6): 464-70. <https://pubmed.ncbi.nlm.nih.gov/18202532/>
- 660 13. Kaneki M HS, Hosoi T, Fujiwara S, Lyons A, Crean SJ, Ishida N, Nakagawa M, Takechi  
661 M, Sano Y, Mizuno Y, Hoshino S, Miyao M, Inoue S, Horiki K, Shiraki M, Ouchi Y,  
662 Orimo H. **Japanese fermented soybean food as the major determinant of the large**  
663 **geographic difference in circulating levels of vitamin K2: possible implications for**  
664 **hip-fracture risk.** *Nutrition.* 2001; **17** (4): 315-21.  
665 <https://pubmed.ncbi.nlm.nih.gov/11369171/>
- 666 14. Tamang JP, Cotter PD, Endo A, et al. **Fermented foods in a global age: East meets**  
667 **West.** *Comprehensive Reviews in Food Science and Food Safety.* 2020; **19** (1): 184-217.  
668 <https://onlinelibrary.wiley.com/doi/full/10.1111/1541-4337.12520>
- 669 15. Joseph M. Fermented Soy Products: A Guide To 12 Traditional Foods. Nutrition  
670 Advance 2020; Accessed April 11, 2021.

- 671 16. Global Burden of Disease Study 2017 (GBD 2017) Data Input Sources Tool. Seattle,  
672 Washington: Institute of Health Metrics and Evaluation Accessed August 10, 2019.  
673 <http://ghdx.healthdata.org/gbd-2017/data-input-sources>
- 674 17. **GBD 2017 Risk Factor Collaborators. Global, regional, and national comparative**  
675 **risk assessment of 84 behavioural, environmental and occupational, and metabolic**  
676 **risks or clusters of risks for 195 countries and territories, 1990–2017: a systematic**  
677 **analysis for the Global Burden of Disease Study 2017: Table of risk factor**  
678 **definitions.** *The Lancet*. 2018; **392** (10159): 1923-94.  
679 [https://www.thelancet.com/action/showFullTableHTML?isHtml=true&tableId=tbl1&pii=](https://www.thelancet.com/action/showFullTableHTML?isHtml=true&tableId=tbl1&pii=S0140-6736%2818%2932225-6)  
680 [S0140-6736%2818%2932225-6](https://www.thelancet.com/action/showFullTableHTML?isHtml=true&tableId=tbl1&pii=S0140-6736%2818%2932225-6)
- 681 18. PROTOCOL FOR THE GLOBAL BURDEN OF DISEASES, INJURIES, AND RISK  
682 FACTORS STUDY (GBD) Version 3.0; Issue 26. Seattle, Washington: Institute for  
683 Health Metrics and Evaluation Accessed August 2, 2019.  
684 [http://www.healthdata.org/sites/default/files/files/Projects/GBD/GBD\\_Protocol.pdf](http://www.healthdata.org/sites/default/files/files/Projects/GBD/GBD_Protocol.pdf)
- 685 19. Naghavi M, Abajobir AA, Abbafati C, et al. **Global, regional, and national age-sex**  
686 **specific mortality for 264 causes of death, 1980–2016: a systematic analysis for the**  
687 **Global Burden of Disease Study 2016.** *The Lancet*. 2017; **390** (10100): 1151-1210.  
688 [https://doi.org/10.1016/S0140-6736\(17\)32152-9](https://doi.org/10.1016/S0140-6736(17)32152-9)
- 689 20. Flaxman AD, Lee YY, Vos T, et al. An Integrative Metaregression Framework for  
690 Descriptive Epidemiology. Seattle, WA: University of Washington Press, 2015.
- 691 21. GBD 2017 Risk Factor Collaborators. **Global, regional, and national comparative risk**  
692 **assessment of 84 behavioural, environmental and occupational, and metabolic risks**  
693 **or clusters of risks for 195 countries and territories, 1990–2017: a systematic**  
694 **analysis for the Global Burden of Disease Study 2017.** . *The Lancet*. 2018; **392**  
695 (10159): 1923-94. [https://doi.org/10.1016/S0140-6736\(18\)32225-6](https://doi.org/10.1016/S0140-6736(18)32225-6)
- 696 22. Call for Collaborators. . Seattle, Washington: Institute for Health Metrics and Evaluation  
697 at the University of Washington 2019; Accessed April 25, 2019.  
698 <http://www.healthdata.org/gbd/call-for-collaborators>
- 699 23. Stevens GA, Alkema L, Black PRE, et al. **Guidelines for Accurate and Transparent**  
700 **Health Estimates Reporting: the GATHER statement.** *The Lancet*. 2016; **388**  
701 (10062): e19-e23. [https://doi.org/10.1016/S0140-6736\(16\)30388-9](https://doi.org/10.1016/S0140-6736(16)30388-9)
- 702 24. Omega 3 Fatty Acids: Fact Sheet for Health Professionals. The Office of Dietary  
703 Supplements 2018; Accessed September 1, 2018.  
704 <https://ods.od.nih.gov/factsheets/Omega3FattyAcids-HealthProfessional/>
- 705 25. Nutritionix Track App. Syndigo LLC Accessed April 25, 2019.  
706 <https://www.nutritionix.com/>
- 707 26. Ritchie H, Roser M. **Diet Compositions.** *Our World in Data*. 2017.  
708 <https://ourworldindata.org/diet-compositions>
- 709 27. Pu J, Romanelli R, Zhao B, et al. **Dyslipidemia in special ethnic populations.**  
710 *Cardiology clinics*. 2015; **33** (2): 325-333.  
711 <https://www.ncbi.nlm.nih.gov/pmc/articles/PMC4421090/>
- 712 28. Frank ATH, Zhao B, Jose PO, Azar KMJ, Fortmann SP, Palaniappan LP. **Racial/ethnic**  
713 **differences in dyslipidemia patterns.** *Circulation*. 2014; **129** (5): 570-579.  
714 <https://www.ncbi.nlm.nih.gov/pmc/articles/PMC4212818/>
- 715 29. Mahmood SS, Levy D, Vasan RS, Wang TJ. **The Framingham Heart Study and the**  
716 **epidemiology of cardiovascular disease: a historical perspective.** *Lancet (London,*

- 717 *England*). 2014; **383** (9921): 999-1008.  
718 <https://www.ncbi.nlm.nih.gov/pmc/articles/PMC4159698/>  
719 30. Dehghan M, Mente A, Zhang X, et al. **Associations of fats and carbohydrate intake**  
720 **with cardiovascular disease and mortality in 18 countries from five continents**  
721 **(PURE): a prospective cohort study.** *The Lancet*. 2017; **390** (10107): 2050-2062.  
722 [https://doi.org/10.1016/S0140-6736\(17\)32252-3](https://doi.org/10.1016/S0140-6736(17)32252-3)  
723 31. Countries Who Eat The Most Cheese. World Atlas 2021; Accessed March 28, 2021.  
724 [https://www.worldatlas.com/articles/countries-who-consume-the-most-](https://www.worldatlas.com/articles/countries-who-consume-the-most-cheese.html#:~:text=The%20top%20cheese%20consumer%20is,kilograms%20of%20cheese%20per%20capita.)  
725 [cheese.html#:~:text=The%20top%20cheese%20consumer%20is,kilograms%20of%20cheese%20per%20capita.](https://www.worldatlas.com/articles/countries-who-consume-the-most-cheese.html#:~:text=The%20top%20cheese%20consumer%20is,kilograms%20of%20cheese%20per%20capita.)  
726  
727 32. Cheese Consumption Per Capita in New Zealand. Czech Republic: Helgi Library,  
728 Source: Faostat Accessed April 9, 2021. [https://www.helgilibrary.com/indicators/cheese-](https://www.helgilibrary.com/indicators/cheese-consumption-per-capita/new-zealand/)  
729 [consumption-per-capita/new-zealand/](https://www.helgilibrary.com/indicators/cheese-consumption-per-capita/new-zealand/)  
730 33. Khalil Z, Alam B, Akbari AR, Sharma H. **The Medical Benefits of Vitamin K(2) on**  
731 **Calcium-Related Disorders.** *Nutrients*. 2021; **13** (2): 691.  
732 <https://www.ncbi.nlm.nih.gov/pmc/articles/PMC7926526/>  
733 34. POTATO PROCESSING AND USES. Lima, Peru: International Potato Center  
734 Accessed May 28, 2020. <https://cipotato.org/potato/potato-processing-uses/>  
735 35. Juul F, Vaidean G, Lin Y, Deierlein Andrea L, Parekh N. **Ultra-Processed Foods and**  
736 **Incident Cardiovascular Disease in the Framingham Offspring Study.** *Journal of the*  
737 *American College of Cardiology*. 2021; **77** (12): 1520-1531.  
738 <https://doi.org/10.1016/j.jacc.2021.01.047>  
739 36. Srour B, Fezeu LK, Kesse-Guyot E, et al. **Ultra-processed food intake and risk of**  
740 **cardiovascular disease: prospective cohort study (NutriNet-Santé).** *BMJ*. 2019; **365**:  
741 11451. <https://www.bmj.com/content/bmj/365/bmj.11451.full.pdf>  
742 37. Monteiro CA, Moubarac JC, Cannon G, Ng SW, Popkin B. **Ultra-processed products**  
743 **are becoming dominant in the global food system.** *Obes Rev*. 2013; **14** Suppl 2: 21-8.  
744 38. Mozaffarian D, Fahimi S, Singh GM, et al. **Global Sodium Consumption and Death**  
745 **from Cardiovascular Causes.** *New England Journal of Medicine*. 2014; **371** (7): 624-  
746 634. <https://www.nejm.org/doi/full/10.1056/NEJMoa1304127>  
747 39. O'Donnell M, Mente A, Yusuf S. **Sodium Intake and Cardiovascular Health.**  
748 *Circulation Research*. 2015; **116** (6): 1046-1057.  
749 <https://www.ahajournals.org/doi/abs/10.1161/CIRCRESAHA.116.303771>  
750 40. Roseboom T, van der Meulen JHP, Osmond C, et al. **Coronary heart disease after**  
751 **prenatal exposure to the Dutch famine, 1944-45.** *Heart*. 2000; **84** (6): 595-598.  
752 <https://www.heart.bmj.com/content/84/6/595>  
753 41. Dieterich CM, Felice JP, O'Sullivan E, Rasmussen KM. **Breastfeeding and health**  
754 **outcomes for the mother-infant dyad.** *Pediatric clinics of North America*. 2013; **60** (1):  
755 31-48. <https://www.ncbi.nlm.nih.gov/pmc/articles/PMC3508512/>  
756 42. Ambient (outdoor) air pollution. Geneva, Switzerland: World Health Organization 2018;  
757 Accessed March 24, 2021. [https://www.who.int/news-room/fact-sheets/detail/ambient-](https://www.who.int/news-room/fact-sheets/detail/ambient-(outdoor)-air-quality-and-health)  
758 [\(outdoor\)-air-quality-and-health](https://www.who.int/news-room/fact-sheets/detail/ambient-(outdoor)-air-quality-and-health)  
759 43. Tobacco responsible for 20% of deaths from coronary heart disease Geneva,  
760 Switzerland: World Health Organization 2020; Accessed March 2, 2021.  
761 [https://www.who.int/news/item/22-09-2020-tobacco-responsible-for-20-of-deaths-from-](https://www.who.int/news/item/22-09-2020-tobacco-responsible-for-20-of-deaths-from-coronary-heart-disease)  
762 [coronary-heart-disease](https://www.who.int/news/item/22-09-2020-tobacco-responsible-for-20-of-deaths-from-coronary-heart-disease)

- 763 44. Vaziri ND. **Mechanisms of lead-induced hypertension and cardiovascular disease.**  
764 *American Journal of Physiology-Heart and Circulatory Physiology.* 2008; **295** (2):  
765 H454-H465. <https://journals.physiology.org/doi/abs/10.1152/ajpheart.00158.2008>  
766 45. Lanphear BP, Rauch S, Auinger P, Allen RW, Hornung RW. **Low-level lead exposure**  
767 **and mortality in US adults: a population-based cohort study.** *The Lancet Public*  
768 *Health.* 2018; **3** (4): e177-e184. [https://doi.org/10.1016/S2468-2667\(18\)30025-2](https://doi.org/10.1016/S2468-2667(18)30025-2)  
769 46. Bikbov B, Purcell CA, Levey AS, et al. **Global, regional, and national burden of**  
770 **chronic kidney disease, 1990-2017: a systematic analysis for the Global Burden of**  
771 **Disease Study 2017.** *The Lancet.* 2020; **395** (10225): 709-733.  
772 [https://doi.org/10.1016/S0140-6736\(20\)30045-3](https://doi.org/10.1016/S0140-6736(20)30045-3)  
773 47. Ioannidis JA. **The challenge of reforming nutritional epidemiologic research.** *JAMA.*  
774 2018; **320** (10): 969-970. <http://dx.doi.org/10.1001/jama.2018.11025>  
775 48. **Global, regional, and national age-sex-specific mortality for 282 causes of death in**  
776 **195 countries and territories, 1980-2017: a systematic analysis for the Global**  
777 **Burden of Disease Study 2017.** *Lancet.* 2018; **392** (10159): 1736-1788.  
778 [https://www.thelancet.com/journals/lancet/article/PIIS0140-6736\(18\)32203-7/fulltext](https://www.thelancet.com/journals/lancet/article/PIIS0140-6736(18)32203-7/fulltext)  
779 49. Afshin A, Sur PJ, Fay KA, et al. **Health effects of dietary risks in 195 countries, 1990-**  
780 **2017: a systematic analysis for the Global Burden of Disease Study 2017.** *The Lancet.*  
781 2019; **393** (10184): 1958-1972. [https://doi.org/10.1016/S0140-6736\(19\)30041-8](https://doi.org/10.1016/S0140-6736(19)30041-8)  
782  
783
